# Supplementary material
Source: ML conference proceedings conference paper supplement (https://openaccess.thecvf.com/content/WACV2025/html/Karunanayake_CRAFT_Class_Ranking_WACV_2025_paper.html)
Supplement: Supplementary file 1 [file Karunanayake_CRAFT_Class_Ranking_WACV_2025_supplemental.pdf]

## A. Appendix

In this appendix, we present additional details and results that were excluded from the main content due to space limitations.

### A.1. Comparison with baselines

In main text Tab. 1 and 2, we reported results only for the baselines that ranked in the top five in at least one experiment. Here, we report the complete results for all 33 baselines for near-OOD detection in Tab. 5 and far-OOD detection in Tab. 6. The key insights for each table are provided in the caption.

### A.2. Per-dataset results

In Sec. 5.1, we reported the average AUROC and FPR95 performance for near-OOD (i.e., Tab. 1) and far-OOD (i.e., Tab. 2) detection for each ID dataset, averaged across all OOD datasets corresponding to that ID dataset. Here, we provide the per-dataset results for each OOD benchmark corresponding to each ID dataset. Specifically, for CIFAR-10, we present the FPR95 and AUROC performances in Tab. 7 and 8, respectively. Similarly, per-dataset results for CIFAR-100 are reported in Tab. 9 and 10, and for ImageNet-200, in Tab. 11 and 12. Finally, Tab. 13 reports the per-dataset results for the experiments conducted for outlier exposure (OE) [14] method using different auxiliary outliers for training (cf. Sec. 5.4 in the main text).

Table 5. Performance comparison in *near-OOD detection*. For each column, the top five methods are marked in **bold**.

Note that N/A indicates that results are not reported in OpenOOD.

*OE achieves the best performance with an average FPR95 of 34.29, while CRAFT ranks second with an average FPR95 of 46.76. However, the high performance of OE is later shown to be influenced by a bias toward seen outliers during training, making its results less reliable (cf. Sec. 5.4 in the main text). CRAFT shows an average improvement of at least 3% over all other baselines that do not rely on outliers in the more challenging near-OOD detection setting.*

| Method                            | CIFAR-10                           |                                    | CIFAR-100                          |                                    | ImageNet-200                       |                                    | Average          |                    |
|-----------------------------------|------------------------------------|------------------------------------|------------------------------------|------------------------------------|------------------------------------|------------------------------------|------------------|--------------------|
|                                   | AUROC $\uparrow$                   | FPR95 $\downarrow$                 | AUROC $\uparrow$                   | FPR95 $\downarrow$                 | AUROC $\uparrow$                   | FPR95 $\downarrow$                 | AUROC $\uparrow$ | FPR95 $\downarrow$ |
| Post-hoc inference methods        |                                    |                                    |                                    |                                    |                                    |                                    |                  |                    |
| OpenMax [1]                       | 87.62 $\pm$ 0.29                   | 43.62 $\pm$ 2.27                   | 76.41 $\pm$ 0.25                   | 56.58 $\pm$ 0.73                   | 80.27 $\pm$ 0.10                   | 63.48 $\pm$ 0.25                   | 81.43            | 54.56              |
| MSP [13]                          | 88.03 $\pm$ 0.25                   | 48.17 $\pm$ 3.92                   | 80.27 $\pm$ 0.11                   | <b>54.80 <math>\pm</math> 0.33</b> | 83.34 $\pm$ 0.06                   | <b>54.82 <math>\pm</math> 0.35</b> | 83.88            | 52.60              |
| TempScale [10]                    | 88.09 $\pm$ 0.31                   | 50.96 $\pm$ 4.32                   | 80.90 $\pm$ 0.07                   | <b>54.49 <math>\pm</math> 0.48</b> | <b>83.69 <math>\pm</math> 0.04</b> | <b>54.82 <math>\pm</math> 0.23</b> | <b>84.23</b>     | 53.42              |
| ODIN [23]                         | 82.87 $\pm$ 1.85                   | 76.19 $\pm$ 6.08                   | 79.90 $\pm$ 0.11                   | 57.91 $\pm$ 0.51                   | 80.27 $\pm$ 0.08                   | 66.76 $\pm$ 0.26                   | 81.01            | 66.95              |
| MDS [22]                          | 84.20 $\pm$ 2.40                   | 49.90 $\pm$ 3.98                   | 58.69 $\pm$ 0.09                   | 83.53 $\pm$ 0.60                   | 61.93 $\pm$ 0.51                   | 79.11 $\pm$ 0.31                   | 68.27            | 70.85              |
| MDSEns [22]                       | 60.43 $\pm$ 0.26                   | 92.26 $\pm$ 0.20                   | 46.31 $\pm$ 0.24                   | 95.88 $\pm$ 0.04                   | 54.32 $\pm$ 0.24                   | 91.75 $\pm$ 0.10                   | 53.69            | 93.30              |
| RMDs [29]                         | 89.80 $\pm$ 0.28                   | 38.89 $\pm$ 2.39                   | 80.15 $\pm$ 0.11                   | 55.46 $\pm$ 0.41                   | 82.57 $\pm$ 0.25                   | <b>54.02 <math>\pm</math> 0.58</b> | 84.17            | <b>49.46</b>       |
| Gram [31]                         | 58.66 $\pm$ 4.83                   | 90.87 $\pm$ 1.91                   | 51.66 $\pm$ 0.77                   | 92.28 $\pm$ 0.29                   | 67.67 $\pm$ 1.07                   | 86.40 $\pm$ 1.21                   | 59.33            | 89.85              |
| EBO [24]                          | 87.58 $\pm$ 0.46                   | 61.34 $\pm$ 4.63                   | <b>80.91 <math>\pm</math> 0.08</b> | 55.62 $\pm$ 0.61                   | 82.50 $\pm$ 0.05                   | 60.24 $\pm$ 0.57                   | 83.66            | 59.07              |
| OpenGAN [19]                      | 53.71 $\pm$ 7.68                   | 94.48 $\pm$ 4.01                   | 65.98 $\pm$ 1.26                   | 76.52 $\pm$ 2.59                   | 59.79 $\pm$ 3.39                   | 84.15 $\pm$ 3.85                   | 59.83            | 85.05              |
| GradNorm [17]                     | 54.90 $\pm$ 0.98                   | 94.72 $\pm$ 0.82                   | 70.13 $\pm$ 0.47                   | 85.58 $\pm$ 0.46                   | 72.75 $\pm$ 0.48                   | 82.67 $\pm$ 0.30                   | 65.93            | 87.66              |
| ReAct [33]                        | 87.11 $\pm$ 0.61                   | 63.56 $\pm$ 7.33                   | 80.77 $\pm$ 0.05                   | 56.39 $\pm$ 0.34                   | 81.87 $\pm$ 0.98                   | 62.49 $\pm$ 2.19                   | 83.25            | 60.81              |
| MLS [12]                          | 87.52 $\pm$ 0.47                   | 61.32 $\pm$ 4.62                   | <b>81.05 <math>\pm</math> 0.07</b> | 55.47 $\pm$ 0.66                   | 82.90 $\pm$ 0.04                   | 59.76 $\pm$ 0.59                   | 83.82            | 58.85              |
| KLM [12]                          | 79.19 $\pm$ 0.80                   | 87.86 $\pm$ 6.37                   | 76.56 $\pm$ 0.25                   | 77.92 $\pm$ 1.31                   | 80.76 $\pm$ 0.08                   | 70.26 $\pm$ 0.64                   | 78.84            | 78.68              |
| VIM [39]                          | 88.68 $\pm$ 0.28                   | 44.84 $\pm$ 2.31                   | 74.98 $\pm$ 0.13                   | 62.63 $\pm$ 0.27                   | 78.68 $\pm$ 0.24                   | 59.19 $\pm$ 0.71                   | 80.78            | 55.55              |
| KNN [35]                          | 90.64 $\pm$ 0.20                   | 34.01 $\pm$ 0.38                   | 80.18 $\pm$ 0.15                   | 61.22 $\pm$ 0.14                   | 81.57 $\pm$ 0.17                   | 60.18 $\pm$ 0.52                   | 84.13            | 51.80              |
| DICE [34]                         | 78.34 $\pm$ 0.79                   | 70.04 $\pm$ 7.64                   | 79.38 $\pm$ 0.23                   | 57.95 $\pm$ 0.53                   | 81.78 $\pm$ 0.14                   | 61.88 $\pm$ 0.67                   | 79.83            | 63.29              |
| RankFeat [32]                     | 79.46 $\pm$ 2.52                   | 60.88 $\pm$ 4.60                   | 61.88 $\pm$ 1.28                   | 80.59 $\pm$ 1.10                   | 56.92 $\pm$ 1.59                   | 92.06 $\pm$ 0.23                   | 66.09            | 77.84              |
| ASH [8]                           | 75.27 $\pm$ 1.04                   | 86.78 $\pm$ 1.82                   | 78.20 $\pm$ 0.15                   | 65.71 $\pm$ 0.24                   | 82.38 $\pm$ 0.19                   | 64.89 $\pm$ 0.90                   | 78.62            | 72.46              |
| SHE [44]                          | 81.54 $\pm$ 0.51                   | 79.65 $\pm$ 3.47                   | 78.95 $\pm$ 0.18                   | 59.07 $\pm$ 0.25                   | 80.18 $\pm$ 0.25                   | 66.80 $\pm$ 0.74                   | 80.22            | 68.51              |
| GEN [25]                          | 88.20 $\pm$ 0.30                   | 53.67 $\pm$ 3.14                   | <b>81.31 <math>\pm</math> 0.08</b> | <b>54.42 <math>\pm</math> 0.33</b> | <b>83.68 <math>\pm</math> 0.06</b> | 55.20 $\pm$ 0.20                   | <b>84.40</b>     | 54.43              |
| ExCeL [18]                        | 86.89 $\pm$ 0.23                   | 66.55 $\pm$ 0.43                   | 80.70 $\pm$ 0.06                   | 55.21 $\pm$ 0.56                   | 82.40 $\pm$ 0.04                   | 57.90 $\pm$ 0.40                   | 83.33            | 59.89              |
| Training methods without outliers |                                    |                                    |                                    |                                    |                                    |                                    |                  |                    |
| CRAFT (Ours)                      | <b>91.11 <math>\pm</math> 0.04</b> | <b>31.94 <math>\pm</math> 1.41</b> | 80.90 $\pm$ 0.33                   | <b>53.73 <math>\pm</math> 0.62</b> | <b>83.65 <math>\pm</math> 0.41</b> | <b>54.62 <math>\pm</math> 0.57</b> | <b>85.22</b>     | <b>46.76</b>       |
| ConfBranch [7]                    | 89.84 $\pm$ 0.24                   | <b>31.28 <math>\pm</math> 0.66</b> | 71.60 $\pm$ 0.62                   | 70.21 $\pm$ 0.83                   | 79.10 $\pm$ 0.24                   | 61.44 $\pm$ 0.34                   | 80.18            | 54.31              |
| G-ODIN [15]                       | 89.12 $\pm$ 0.57                   | 45.54 $\pm$ 2.52                   | 77.15 $\pm$ 0.28                   | 67.58 $\pm$ 0.98                   | 77.28 $\pm$ 0.10                   | 69.87 $\pm$ 0.46                   | 81.18            | 61.00              |
| CSI [36]                          | 89.51 $\pm$ 0.19                   | 33.66 $\pm$ 0.64                   | 71.45 $\pm$ 0.27                   | 70.26 $\pm$ 0.56                   | N/A                                | N/A                                | 80.48            | 51.96              |
| ARPL [4]                          | 87.44 $\pm$ 0.15                   | 40.33 $\pm$ 0.70                   | 74.94 $\pm$ 0.93                   | 61.56 $\pm$ 1.81                   | 82.02 $\pm$ 0.10                   | 55.74 $\pm$ 0.70                   | 81.47            | 52.54              |
| MOS [16]                          | 71.45 $\pm$ 3.09                   | 78.72 $\pm$ 5.86                   | 80.40 $\pm$ 0.18                   | 56.05 $\pm$ 1.01                   | 69.84 $\pm$ 0.46                   | 71.60 $\pm$ 0.48                   | 73.90            | 68.79              |
| LogitNorm [40]                    | <b>92.33 <math>\pm</math> 0.08</b> | <b>29.34 <math>\pm</math> 0.81</b> | 78.47 $\pm$ 0.31                   | 62.89 $\pm$ 0.57                   | 82.66 $\pm$ 0.15                   | 56.46 $\pm$ 0.37                   | <b>84.49</b>     | <b>49.56</b>       |
| CIDER [27]                        | <b>90.71 <math>\pm</math> 0.16</b> | 32.11 $\pm$ 0.94                   | 73.10 $\pm$ 0.39                   | 72.02 $\pm$ 0.31                   | 80.58 $\pm$ 1.75                   | 60.10 $\pm$ 0.73                   | 81.46            | 54.74              |
| Training methods with outliers    |                                    |                                    |                                    |                                    |                                    |                                    |                  |                    |
| OE [14]                           | <b>94.82 <math>\pm</math> 0.21</b> | <b>19.84 <math>\pm</math> 0.95</b> | <b>88.30 <math>\pm</math> 0.10</b> | <b>30.73 <math>\pm</math> 0.11</b> | <b>84.84 <math>\pm</math> 0.16</b> | <b>52.30 <math>\pm</math> 0.67</b> | <b>89.32</b>     | <b>34.29</b>       |
| MCD [43]                          | <b>91.03 <math>\pm</math> 0.12</b> | <b>30.17 <math>\pm</math> 0.06</b> | 77.07 $\pm$ 0.32                   | 55.88 $\pm$ 0.85                   | <b>83.62 <math>\pm</math> 0.09</b> | <b>54.71 <math>\pm</math> 0.83</b> | 83.91            | <b>46.92</b>       |
| UDG [42]                          | 89.91 $\pm$ 0.25                   | 35.34 $\pm$ 0.95                   | 78.02 $\pm$ 0.10                   | 61.42 $\pm$ 0.48                   | 74.30 $\pm$ 1.63                   | 68.89 $\pm$ 1.72                   | 80.74            | 55.22              |
| MixOE [45]                        | 88.73 $\pm$ 0.82                   | 51.45 $\pm$ 7.78                   | <b>80.95 <math>\pm</math> 0.20</b> | 55.22 $\pm$ 0.49                   | 82.62 $\pm$ 0.03                   | 57.97 $\pm$ 0.40                   | 84.10            | 54.88              |

Table 6. Performance comparison in *far-OOD detection*. For each column, the top five methods are marked in **bold**.

Note that N/A indicates that results are not reported in OpenOOD.

*CRAFT ranks fourth in AUROC with an average of 88.95 and fifth in FPR95 with an average of 34.64 in far-OOD detection. LogitNorm and G-ODIN exhibit the best performance, surpassing CRAFT by approximately 3% in terms of FPR95. Despite this, CRAFT outperforms LogitNorm on CIFAR-100 and G-ODIN on CIFAR-10. Notably, on CIFAR-100 and ImageNet-200, CRAFT outperforms OE, which uses outliers for training.*

| Method                            | CIFAR-10                           |                                    | CIFAR-100                          |                                    | ImageNet-200                       |                                    | Average          |                    |
|-----------------------------------|------------------------------------|------------------------------------|------------------------------------|------------------------------------|------------------------------------|------------------------------------|------------------|--------------------|
|                                   | AUROC $\uparrow$                   | FPR95 $\downarrow$                 | AUROC $\uparrow$                   | FPR95 $\downarrow$                 | AUROC $\uparrow$                   | FPR95 $\downarrow$                 | AUROC $\uparrow$ | FPR95 $\downarrow$ |
| Post-hoc inference methods        |                                    |                                    |                                    |                                    |                                    |                                    |                  |                    |
| OpenMax [1]                       | 89.62 $\pm$ 0.19                   | 29.69 $\pm$ 1.21                   | 79.48 $\pm$ 0.41                   | 54.50 $\pm$ 0.68                   | 90.20 $\pm$ 0.17                   | 33.12 $\pm$ 0.66                   | 86.43            | 39.10              |
| MSP [13]                          | 90.73 $\pm$ 0.43                   | 31.72 $\pm$ 1.84                   | 77.76 $\pm$ 0.44                   | 58.70 $\pm$ 1.06                   | 90.13 $\pm$ 0.09                   | 35.43 $\pm$ 0.38                   | 86.21            | 41.95              |
| TempScale [10]                    | 90.97 $\pm$ 0.52                   | 33.48 $\pm$ 2.39                   | 78.74 $\pm$ 0.51                   | 57.94 $\pm$ 1.14                   | 90.82 $\pm$ 0.09                   | 34.00 $\pm$ 0.37                   | 86.84            | 41.81              |
| ODIN [23]                         | 87.96 $\pm$ 0.61                   | 57.62 $\pm$ 4.24                   | 79.28 $\pm$ 0.21                   | 58.86 $\pm$ 0.79                   | 91.71 $\pm$ 0.19                   | 34.23 $\pm$ 1.05                   | 86.32            | 50.24              |
| MDS [22]                          | 89.72 $\pm$ 1.36                   | 32.22 $\pm$ 3.40                   | 69.39 $\pm$ 1.39                   | 72.26 $\pm$ 1.56                   | 74.72 $\pm$ 0.26                   | 61.66 $\pm$ 0.27                   | 77.94            | 55.38              |
| MDSEns [22]                       | 73.90 $\pm$ 0.27                   | 61.47 $\pm$ 0.48                   | 66.00 $\pm$ 0.69                   | 66.74 $\pm$ 1.04                   | 69.27 $\pm$ 0.57                   | 80.96 $\pm$ 0.38                   | 69.72            | 69.72              |
| RMDS [29]                         | 92.20 $\pm$ 0.21                   | 25.35 $\pm$ 0.73                   | <b>82.92 <math>\pm</math> 0.42</b> | <b>52.81 <math>\pm</math> 0.63</b> | 88.06 $\pm$ 0.34                   | 32.45 $\pm$ 0.79                   | 87.73            | 36.87              |
| Gram [29]                         | 71.73 $\pm$ 3.20                   | 72.34 $\pm$ 6.73                   | 73.36 $\pm$ 1.08                   | 64.44 $\pm$ 2.37                   | 71.19 $\pm$ 0.24                   | 84.36 $\pm$ 0.78                   | 72.09            | 73.71              |
| EBO [24]                          | 91.21 $\pm$ 0.92                   | 41.69 $\pm$ 5.32                   | 79.77 $\pm$ 0.61                   | 56.59 $\pm$ 1.38                   | 90.86 $\pm$ 0.21                   | 34.86 $\pm$ 1.30                   | 87.28            | 44.38              |
| OpenGAN [19]                      | 54.61 $\pm$ 15.5                   | 83.52 $\pm$ 11.63                  | 67.88 $\pm$ 7.16                   | 70.49 $\pm$ 7.38                   | 73.15 $\pm$ 4.07                   | 64.16 $\pm$ 9.33                   | 65.21            | 72.72              |
| GradNorm [17]                     | 57.55 $\pm$ 3.22                   | 91.90 $\pm$ 2.23                   | 69.14 $\pm$ 1.05                   | 83.68 $\pm$ 1.92                   | 84.26 $\pm$ 0.87                   | 66.45 $\pm$ 0.22                   | 70.32            | 80.68              |
| ReAct [33]                        | 90.42 $\pm$ 1.41                   | 44.90 $\pm$ 8.37                   | 80.39 $\pm$ 0.49                   | 54.20 $\pm$ 1.56                   | <b>92.31 <math>\pm</math> 0.56</b> | 28.50 $\pm$ 0.95                   | 87.71            | 42.53              |
| MLS [12]                          | 91.10 $\pm$ 0.89                   | 41.68 $\pm$ 5.27                   | 79.67 $\pm$ 0.57                   | 56.73 $\pm$ 1.33                   | 91.11 $\pm$ 0.19                   | 34.03 $\pm$ 1.21                   | 87.29            | 44.15              |
| KLM [12]                          | 82.68 $\pm$ 0.21                   | 78.31 $\pm$ 4.84                   | 76.24 $\pm$ 0.52                   | 71.65 $\pm$ 2.01                   | 88.53 $\pm$ 0.11                   | 40.90 $\pm$ 1.08                   | 82.48            | 63.62              |
| VIM [39]                          | 93.48 $\pm$ 0.24                   | 25.05 $\pm$ 0.52                   | 81.70 $\pm$ 0.62                   | <b>50.74 <math>\pm</math> 1.00</b> | 91.26 $\pm$ 0.19                   | <b>27.20 <math>\pm</math> 0.30</b> | <b>88.81</b>     | <b>34.33</b>       |
| KNN [35]                          | 92.96 $\pm$ 0.14                   | 24.27 $\pm$ 0.40                   | <b>82.40 <math>\pm</math> 0.17</b> | 53.65 $\pm$ 0.28                   | <b>93.16 <math>\pm</math> 0.22</b> | <b>27.27 <math>\pm</math> 0.75</b> | <b>89.51</b>     | 35.06              |
| DICE [34]                         | 84.23 $\pm$ 1.89                   | 51.76 $\pm$ 4.42                   | 80.01 $\pm$ 0.18                   | 56.25 $\pm$ 0.60                   | 90.80 $\pm$ 0.31                   | 36.51 $\pm$ 1.18                   | 85.01            | 48.17              |
| RankFeat [32]                     | 75.87 $\pm$ 5.06                   | 57.44 $\pm$ 7.99                   | 67.10 $\pm$ 1.42                   | 69.45 $\pm$ 1.01                   | 38.22 $\pm$ 3.85                   | 97.72 $\pm$ 0.75                   | 60.40            | 74.87              |
| ASH [8]                           | 78.49 $\pm$ 2.58                   | 79.03 $\pm$ 4.22                   | 80.58 $\pm$ 0.66                   | 59.20 $\pm$ 2.46                   | <b>93.90 <math>\pm</math> 0.27</b> | <b>27.29 <math>\pm</math> 1.12</b> | 84.32            | 55.17              |
| SHE [44]                          | 85.32 $\pm$ 1.43                   | 66.48 $\pm$ 5.98                   | 76.92 $\pm$ 1.16                   | 64.12 $\pm$ 2.70                   | 89.81 $\pm$ 0.61                   | 42.17 $\pm$ 1.24                   | 84.02            | 57.59              |
| GEN [25]                          | 91.35 $\pm$ 0.69                   | 34.73 $\pm$ 1.58                   | 79.68 $\pm$ 0.75                   | 56.71 $\pm$ 1.59                   | 91.36 $\pm$ 0.10                   | 32.10 $\pm$ 0.59                   | 87.46            | 41.18              |
| ExCeL [18]                        | 91.69 $\pm$ 0.18                   | 40.03 $\pm$ 0.84                   | <b>82.04 <math>\pm</math> 0.90</b> | <b>52.24 <math>\pm</math> 1.90</b> | 91.97 $\pm$ 0.27                   | <b>28.45 <math>\pm</math> 0.80</b> | 88.57            | 40.24              |
| Training methods without outliers |                                    |                                    |                                    |                                    |                                    |                                    |                  |                    |
| CRAFT (Ours)                      | 93.94 $\pm$ 0.20                   | <b>19.40 <math>\pm</math> 0.88</b> | <b>82.03 <math>\pm</math> 0.34</b> | <b>51.86 <math>\pm</math> 0.49</b> | 90.88 $\pm$ 0.89                   | 32.67 $\pm$ 1.13                   | <b>88.95</b>     | <b>34.64</b>       |
| ConfBranch [7]                    | 92.85 $\pm$ 0.29                   | 21.48 $\pm$ 0.94                   | 68.90 $\pm$ 1.83                   | 71.82 $\pm$ 3.39                   | 90.43 $\pm$ 0.18                   | 34.75 $\pm$ 0.63                   | 84.06            | 42.68              |
| G-ODIN [15]                       | <b>95.51 <math>\pm</math> 0.31</b> | 21.45 $\pm$ 1.91                   | <b>85.67 <math>\pm</math> 1.58</b> | <b>42.68 <math>\pm</math> 3.19</b> | <b>92.33 <math>\pm</math> 0.11</b> | 30.18 $\pm$ 0.49                   | <b>91.17</b>     | <b>31.44</b>       |
| CSI [36]                          | 92.00 $\pm$ 0.30                   | 26.42 $\pm$ 0.29                   | 66.31 $\pm$ 1.21                   | 76.92 $\pm$ 1.29                   | N/A                                | N/A                                | 79.16            | 51.67              |
| ARPL [4]                          | 89.31 $\pm$ 0.32                   | 32.39 $\pm$ 0.74                   | 73.69 $\pm$ 1.80                   | 63.14 $\pm$ 2.53                   | 89.23 $\pm$ 0.11                   | 36.46 $\pm$ 0.08                   | 84.08            | 44.00              |
| MOS [16]                          | 76.41 $\pm$ 5.93                   | 62.90 $\pm$ 6.62                   | 80.17 $\pm$ 1.21                   | 57.28 $\pm$ 3.29                   | 80.46 $\pm$ 0.92                   | 51.56 $\pm$ 0.42                   | 79.01            | 57.25              |
| LogitNorm [40]                    | <b>96.74 <math>\pm</math> 0.06</b> | <b>13.81 <math>\pm</math> 0.20</b> | 81.53 $\pm$ 1.26                   | 53.61 $\pm$ 3.45                   | <b>93.04 <math>\pm</math> 0.21</b> | <b>26.11 <math>\pm</math> 0.52</b> | <b>90.44</b>     | <b>31.18</b>       |
| CIDER [27]                        | <b>94.71 <math>\pm</math> 0.36</b> | <b>20.72 <math>\pm</math> 0.85</b> | 80.49 $\pm$ 0.68                   | 54.22 $\pm$ 1.24                   | 90.66 $\pm$ 1.68                   | 30.17 $\pm$ 2.75                   | 88.62            | 35.04              |
| Training methods with outliers    |                                    |                                    |                                    |                                    |                                    |                                    |                  |                    |
| OE [14]                           | <b>96.00 <math>\pm</math> 0.13</b> | <b>13.13 <math>\pm</math> 0.53</b> | 81.41 $\pm$ 1.49                   | 54.82 $\pm$ 2.79                   | 89.02 $\pm$ 0.18                   | 34.17 $\pm$ 0.56                   | <b>88.81</b>     | <b>34.04</b>       |
| MCD [43]                          | 91.00 $\pm$ 1.10                   | 32.03 $\pm$ 4.21                   | 74.72 $\pm$ 0.78                   | 54.39 $\pm$ 1.34                   | 88.94 $\pm$ 0.10                   | 29.93 $\pm$ 0.30                   | 84.89            | 38.78              |
| UDG [42]                          | <b>94.06 <math>\pm</math> 0.90</b> | <b>20.35 <math>\pm</math> 2.41</b> | 79.59 $\pm$ 1.77                   | 59.00 $\pm$ 3.35                   | 82.09 $\pm$ 2.78                   | 62.04 $\pm$ 5.99                   | 85.25            | 47.13              |
| MixOE [45]                        | 91.93 $\pm$ 0.69                   | 33.84 $\pm$ 4.77                   | 76.40 $\pm$ 1.44                   | 63.88 $\pm$ 2.48                   | 88.27 $\pm$ 0.41                   | 40.93 $\pm$ 0.29                   | 85.53            | 46.22              |

Table 7. FPR95 (%  $\downarrow$ ) of various methods for different OOD datasets when CIFAR-10 is ID. For each column, the top five methods are marked in **bold**. *CRAFT ranks within the top five methods in all three near-OOD detection scenarios and in three out of five far-OOD detection scenarios.*

| Method                            | Near OOD                           |                                    |                                    | Far OOD                            |                                    |                                    | Average                            |                                    |
|-----------------------------------|------------------------------------|------------------------------------|------------------------------------|------------------------------------|------------------------------------|------------------------------------|------------------------------------|------------------------------------|
|                                   | CIFAR-100                          | TIN                                | Average                            | MNIST                              | SVHN                               | Textures                           |                                    | Places365                          |
| Post-hoc inference methods        |                                    |                                    |                                    |                                    |                                    |                                    |                                    |                                    |
| OpenMax [1]                       | 48.06 $\pm$ 3.25                   | 39.18 $\pm$ 1.44                   | 43.62 $\pm$ 2.27                   | 23.33 $\pm$ 4.67                   | 25.40 $\pm$ 1.47                   | 31.50 $\pm$ 4.05                   | 38.52 $\pm$ 2.27                   | 29.69 $\pm$ 1.21                   |
| MSP [13]                          | 53.08 $\pm$ 4.86                   | 43.27 $\pm$ 3.00                   | 48.17 $\pm$ 3.92                   | 23.64 $\pm$ 5.81                   | 25.82 $\pm$ 1.64                   | 34.96 $\pm$ 4.64                   | 42.47 $\pm$ 3.81                   | 31.72 $\pm$ 1.84                   |
| TempScale [10]                    | 55.81 $\pm$ 5.07                   | 46.11 $\pm$ 3.63                   | 50.96 $\pm$ 4.32                   | 23.53 $\pm$ 7.05                   | 26.97 $\pm$ 2.65                   | 38.16 $\pm$ 5.89                   | 45.27 $\pm$ 4.50                   | 33.48 $\pm$ 2.39                   |
| ODIN [23]                         | 77.00 $\pm$ 5.74                   | 75.38 $\pm$ 6.42                   | 76.19 $\pm$ 6.08                   | 23.83 $\pm$ 12.3                   | 68.61 $\pm$ 0.52                   | 67.70 $\pm$ 11.1                   | 70.36 $\pm$ 6.96                   | 57.62 $\pm$ 4.24                   |
| MDS [22]                          | 52.81 $\pm$ 3.62                   | 46.99 $\pm$ 4.36                   | 49.90 $\pm$ 3.98                   | 27.30 $\pm$ 3.55                   | 25.96 $\pm$ 2.52                   | 27.94 $\pm$ 4.20                   | 47.67 $\pm$ 4.54                   | 32.22 $\pm$ 3.40                   |
| MDSEns [22]                       | 91.87 $\pm$ 0.10                   | 92.66 $\pm$ 0.42                   | 92.26 $\pm$ 0.20                   | <b>1.30 <math>\pm</math> 0.51</b>  | 74.34 $\pm$ 1.04                   | 76.07 $\pm$ 0.17                   | 94.16 $\pm$ 0.33                   | 61.47 $\pm$ 0.48                   |
| RMDS [29]                         | 43.86 $\pm$ 3.49                   | 33.91 $\pm$ 1.39                   | 38.89 $\pm$ 2.39                   | 21.49 $\pm$ 2.32                   | 23.46 $\pm$ 1.48                   | 25.25 $\pm$ 0.53                   | 31.20 $\pm$ 0.28                   | 25.35 $\pm$ 0.73                   |
| Gram [31]                         | 91.68 $\pm$ 2.24                   | 90.06 $\pm$ 1.59                   | 90.87 $\pm$ 1.91                   | 70.30 $\pm$ 8.96                   | 33.91 $\pm$ 17.4                   | 94.64 $\pm$ 2.71                   | 90.49 $\pm$ 1.93                   | 72.34 $\pm$ 6.73                   |
| EBO [24]                          | 66.60 $\pm$ 4.46                   | 56.08 $\pm$ 4.83                   | 61.34 $\pm$ 4.63                   | 24.99 $\pm$ 12.9                   | 35.12 $\pm$ 6.11                   | 51.82 $\pm$ 6.11                   | 54.85 $\pm$ 6.52                   | 41.69 $\pm$ 5.32                   |
| OpenGAN [19]                      | 94.84 $\pm$ 3.83                   | 94.11 $\pm$ 4.21                   | 94.48 $\pm$ 4.01                   | 79.54 $\pm$ 19.7                   | 75.27 $\pm$ 26.9                   | 83.95 $\pm$ 14.9                   | 95.32 $\pm$ 4.45                   | 83.52 $\pm$ 11.6                   |
| GradNorm [17]                     | 94.54 $\pm$ 1.11                   | 94.89 $\pm$ 0.60                   | 94.72 $\pm$ 0.82                   | 85.41 $\pm$ 4.85                   | 91.65 $\pm$ 2.42                   | 98.09 $\pm$ 0.49                   | 92.46 $\pm$ 2.28                   | 91.90 $\pm$ 2.23                   |
| ReAct [33]                        | 67.40 $\pm$ 7.34                   | 59.71 $\pm$ 7.31                   | 63.56 $\pm$ 7.33                   | 33.77 $\pm$ 18.0                   | 50.23 $\pm$ 15.9                   | 51.42 $\pm$ 11.4                   | 44.20 $\pm$ 3.35                   | 44.90 $\pm$ 8.37                   |
| MLS [12]                          | 66.59 $\pm$ 4.44                   | 56.06 $\pm$ 4.82                   | 61.32 $\pm$ 4.62                   | 25.06 $\pm$ 12.9                   | 35.09 $\pm$ 6.09                   | 51.73 $\pm$ 6.13                   | 54.84 $\pm$ 6.51                   | 41.68 $\pm$ 5.27                   |
| KLM [12]                          | 90.55 $\pm$ 5.83                   | 85.18 $\pm$ 7.60                   | 87.86 $\pm$ 6.37                   | 76.22 $\pm$ 12.1                   | 59.47 $\pm$ 7.06                   | 81.95 $\pm$ 9.95                   | 95.58 $\pm$ 2.12                   | 78.31 $\pm$ 4.84                   |
| VIM [39]                          | 49.19 $\pm$ 3.15                   | 40.49 $\pm$ 1.55                   | 44.84 $\pm$ 2.31                   | 18.36 $\pm$ 1.42                   | 19.29 $\pm$ 0.41                   | <b>21.14 <math>\pm</math> 1.83</b> | 41.43 $\pm$ 2.17                   | 25.05 $\pm$ 0.52                   |
| KNN [35]                          | 37.64 $\pm$ 0.31                   | 30.37 $\pm$ 0.65                   | 34.01 $\pm$ 0.38                   | 20.05 $\pm$ 1.36                   | 22.60 $\pm$ 1.26                   | 24.06 $\pm$ 0.55                   | 30.38 $\pm$ 0.63                   | 24.27 $\pm$ 0.40                   |
| DICE [34]                         | 73.71 $\pm$ 7.67                   | 66.37 $\pm$ 7.68                   | 70.04 $\pm$ 7.64                   | 30.83 $\pm$ 10.5                   | 36.61 $\pm$ 4.74                   | 62.42 $\pm$ 4.79                   | 77.19 $\pm$ 12.6                   | 51.76 $\pm$ 4.42                   |
| RankFeat [32]                     | 65.32 $\pm$ 3.48                   | 56.44 $\pm$ 5.76                   | 60.88 $\pm$ 4.60                   | 61.86 $\pm$ 12.8                   | 64.49 $\pm$ 7.38                   | 59.71 $\pm$ 9.79                   | 43.70 $\pm$ 7.39                   | 57.44 $\pm$ 7.99                   |
| ASH [8]                           | 87.31 $\pm$ 2.06                   | 86.25 $\pm$ 1.58                   | 86.78 $\pm$ 1.82                   | 70.00 $\pm$ 10.6                   | 83.64 $\pm$ 6.48                   | 84.59 $\pm$ 1.74                   | 77.89 $\pm$ 7.28                   | 79.03 $\pm$ 4.22                   |
| SHE [44]                          | 81.00 $\pm$ 3.42                   | 78.30 $\pm$ 3.52                   | 79.65 $\pm$ 3.47                   | 42.22 $\pm$ 20.6                   | 62.74 $\pm$ 4.01                   | 84.60 $\pm$ 5.30                   | 76.36 $\pm$ 5.32                   | 66.48 $\pm$ 5.98                   |
| GEN [25]                          | 58.75 $\pm$ 3.97                   | 48.59 $\pm$ 2.34                   | 53.67 $\pm$ 3.14                   | 23.00 $\pm$ 7.75                   | 28.14 $\pm$ 2.59                   | 40.74 $\pm$ 6.61                   | 47.03 $\pm$ 3.22                   | 34.73 $\pm$ 1.58                   |
| ExCeL [18]                        | 71.16 $\pm$ 1.34                   | 61.42 $\pm$ 0.26                   | 66.55 $\pm$ 0.43                   | <b>15.46 <math>\pm</math> 1.89</b> | 31.78 $\pm$ 3.65                   | 53.67 $\pm$ 2.19                   | 55.09 $\pm$ 1.12                   | 40.03 $\pm$ 0.84                   |
| Training methods without outliers |                                    |                                    |                                    |                                    |                                    |                                    |                                    |                                    |
| CRAFT (Ours)                      | <b>36.61 <math>\pm</math> 2.93</b> | <b>27.28 <math>\pm</math> 0.09</b> | <b>31.94 <math>\pm</math> 1.41</b> | 17.13 $\pm$ 0.99                   | 14.58 $\pm$ 4.62                   | <b>20.78 <math>\pm</math> 0.04</b> | <b>25.12 <math>\pm</math> 0.15</b> | <b>19.40 <math>\pm</math> 0.88</b> |
| ConfBranch [7]                    | <b>34.44 <math>\pm</math> 0.81</b> | <b>28.11 <math>\pm</math> 0.61</b> | <b>31.28 <math>\pm</math> 0.66</b> | <b>15.79 <math>\pm</math> 2.00</b> | <b>14.06 <math>\pm</math> 0.84</b> | 27.24 $\pm$ 1.32                   | 28.85 $\pm$ 1.03                   | 21.48 $\pm$ 0.94                   |
| G-ODIN [15]                       | 48.86 $\pm$ 2.91                   | 42.21 $\pm$ 2.18                   | 45.54 $\pm$ 2.52                   | <b>4.53 <math>\pm</math> 2.08</b>  | <b>10.72 <math>\pm</math> 0.88</b> | 27.27 $\pm$ 6.73                   | 43.30 $\pm$ 3.57                   | 21.45 $\pm$ 1.91                   |
| CSI [36]                          | 37.57 $\pm$ 0.89                   | 29.74 $\pm$ 0.42                   | 33.66 $\pm$ 0.64                   | 24.41 $\pm$ 1.57                   | 17.56 $\pm$ 0.12                   | 28.95 $\pm$ 1.33                   | 34.76 $\pm$ 1.52                   | 26.42 $\pm$ 0.29                   |
| ARPL [4]                          | 43.38 $\pm$ 0.37                   | 37.28 $\pm$ 1.21                   | 40.33 $\pm$ 0.70                   | 21.49 $\pm$ 2.03                   | 35.68 $\pm$ 3.48                   | 35.19 $\pm$ 1.79                   | 37.21 $\pm$ 0.80                   | 32.39 $\pm$ 0.74                   |
| MOS [16]                          | 79.38 $\pm$ 5.06                   | 78.05 $\pm$ 6.69                   | 78.72 $\pm$ 5.86                   | 65.95 $\pm$ 17.5                   | 57.79 $\pm$ 5.79                   | 76.78 $\pm$ 3.86                   | 51.09 $\pm$ 1.33                   | 62.90 $\pm$ 6.62                   |
| LogitNorm [40]                    | <b>34.37 <math>\pm</math> 1.30</b> | <b>24.30 <math>\pm</math> 0.54</b> | <b>29.34 <math>\pm</math> 0.81</b> | <b>3.93 <math>\pm</math> 1.99</b>  | <b>8.33 <math>\pm</math> 1.78</b>  | <b>21.94 <math>\pm</math> 0.85</b> | <b>21.04 <math>\pm</math> 0.71</b> | <b>13.81 <math>\pm</math> 0.20</b> |
| CIDER [27]                        | <b>35.60 <math>\pm</math> 0.78</b> | 28.61 $\pm$ 1.10                   | 32.11 $\pm$ 0.94                   | 24.76 $\pm$ 2.82                   | <b>8.04 <math>\pm</math> 0.43</b>  | 25.05 $\pm$ 3.29                   | <b>25.03 <math>\pm</math> 1.36</b> | <b>20.72 <math>\pm</math> 0.85</b> |
| Training methods with outliers    |                                    |                                    |                                    |                                    |                                    |                                    |                                    |                                    |
| OE [14]                           | 36.71 $\pm$ 2.06                   | <b>2.97 <math>\pm</math> 1.17</b>  | <b>19.84 <math>\pm</math> 0.95</b> | 24.67 $\pm$ 2.55                   | <b>1.25 <math>\pm</math> 0.36</b>  | <b>12.07 <math>\pm</math> 2.14</b> | <b>14.53 <math>\pm</math> 2.80</b> | <b>13.13 <math>\pm</math> 0.53</b> |
| MCD [43]                          | <b>34.36 <math>\pm</math> 0.37</b> | <b>25.98 <math>\pm</math> 0.44</b> | <b>30.17 <math>\pm</math> 0.06</b> | 62.11 $\pm$ 11.8                   | 19.43 $\pm$ 5.93                   | 22.51 $\pm$ 5.16                   | <b>24.10 <math>\pm</math> 1.58</b> | 32.03 $\pm$ 4.21                   |
| UDG [42]                          | 40.75 $\pm$ 0.69                   | 29.93 $\pm$ 1.27                   | 35.34 $\pm$ 0.95                   | 16.61 $\pm$ 5.14                   | 17.39 $\pm$ 7.87                   | <b>19.70 <math>\pm</math> 1.89</b> | 27.70 $\pm$ 1.80                   | <b>20.35 <math>\pm</math> 2.41</b> |
| MixOE [45]                        | 58.29 $\pm$ 8.25                   | 44.62 $\pm$ 7.57                   | 51.45 $\pm$ 7.78                   | 38.28 $\pm$ 13.4                   | 20.36 $\pm$ 3.99                   | 33.19 $\pm$ 4.28                   | 43.54 $\pm$ 4.95                   | 33.84 $\pm$ 4.77                   |

Table 8. AUROC (%  $\uparrow$ ) of various methods for different OOD datasets when CIFAR-10 is ID. For each column, the top five methods are marked in **bold**. *CRAFT ranks within the top five methods in all three near-OOD detection scenarios and in one out of five far-OOD detection scenarios.*

| Method                            | Near OOD                           |                                    |                                    | Far OOD                            |                                    | Average                            |                                    |                                    |
|-----------------------------------|------------------------------------|------------------------------------|------------------------------------|------------------------------------|------------------------------------|------------------------------------|------------------------------------|------------------------------------|
|                                   | CIFAR-100                          | TIN                                | Average                            | MNIST                              | SVHN                               |                                    |                                    |                                    |
| Post-hoc inference methods        |                                    |                                    |                                    |                                    |                                    |                                    |                                    |                                    |
| OpenMax [1]                       | 86.91 $\pm$ 0.31                   | 88.32 $\pm$ 0.28                   | 87.62 $\pm$ 0.29                   | 90.50 $\pm$ 0.44                   | 89.77 $\pm$ 0.45                   | 89.58 $\pm$ 0.60                   | 88.63 $\pm$ 0.28                   | 89.62 $\pm$ 0.19                   |
| MSP [13]                          | 87.19 $\pm$ 0.33                   | 88.87 $\pm$ 0.19                   | 88.03 $\pm$ 0.25                   | 92.63 $\pm$ 1.57                   | 91.46 $\pm$ 0.40                   | 89.89 $\pm$ 0.71                   | 88.92 $\pm$ 0.47                   | 90.73 $\pm$ 0.43                   |
| TempScale [10]                    | 87.17 $\pm$ 0.40                   | 89.00 $\pm$ 0.23                   | 88.09 $\pm$ 0.31                   | 93.11 $\pm$ 1.77                   | 91.66 $\pm$ 0.52                   | 90.01 $\pm$ 0.74                   | 89.11 $\pm$ 0.52                   | 90.97 $\pm$ 0.52                   |
| ODIN [23]                         | 82.18 $\pm$ 1.87                   | 83.55 $\pm$ 1.84                   | 82.87 $\pm$ 1.85                   | 95.24 $\pm$ 1.96                   | 84.58 $\pm$ 0.77                   | 86.94 $\pm$ 2.26                   | 85.07 $\pm$ 1.24                   | 87.96 $\pm$ 0.61                   |
| MDS [22]                          | 83.59 $\pm$ 2.27                   | 84.81 $\pm$ 2.53                   | 84.20 $\pm$ 2.40                   | 90.10 $\pm$ 2.41                   | 91.18 $\pm$ 0.47                   | 92.69 $\pm$ 1.06                   | 84.90 $\pm$ 2.54                   | 89.72 $\pm$ 1.36                   |
| MDSEns [22]                       | 61.29 $\pm$ 0.23                   | 59.57 $\pm$ 0.53                   | 60.43 $\pm$ 0.26                   | <b>99.17 <math>\pm</math> 0.41</b> | 66.56 $\pm$ 0.58                   | 77.40 $\pm$ 0.28                   | 52.47 $\pm$ 0.15                   | 73.90 $\pm$ 0.27                   |
| RMDS [29]                         | 88.83 $\pm$ 0.35                   | 90.76 $\pm$ 0.27                   | 89.80 $\pm$ 0.28                   | 93.22 $\pm$ 0.80                   | 91.84 $\pm$ 0.26                   | 92.23 $\pm$ 0.23                   | 91.51 $\pm$ 0.11                   | 92.20 $\pm$ 0.21                   |
| Gram [31]                         | 58.33 $\pm$ 4.49                   | 58.98 $\pm$ 5.19                   | 58.66 $\pm$ 4.83                   | 72.64 $\pm$ 2.34                   | 91.52 $\pm$ 4.45                   | 62.34 $\pm$ 8.27                   | 60.44 $\pm$ 3.41                   | 71.73 $\pm$ 3.20                   |
| EBO [24]                          | 86.36 $\pm$ 0.58                   | 88.80 $\pm$ 0.36                   | 87.58 $\pm$ 0.46                   | 94.32 $\pm$ 2.53                   | 91.79 $\pm$ 0.98                   | 89.47 $\pm$ 0.70                   | 89.25 $\pm$ 0.78                   | 91.21 $\pm$ 0.92                   |
| OpenGAN [19]                      | 52.81 $\pm$ 7.69                   | 54.62 $\pm$ 7.68                   | 53.71 $\pm$ 7.68                   | 56.14 $\pm$ 24.1                   | 52.81 $\pm$ 27.6                   | 56.14 $\pm$ 18.3                   | 53.34 $\pm$ 5.79                   | 54.61 $\pm$ 15.5                   |
| GradNorm [17]                     | 54.43 $\pm$ 1.59                   | 55.37 $\pm$ 0.41                   | 54.90 $\pm$ 0.98                   | 63.72 $\pm$ 7.37                   | 53.91 $\pm$ 6.36                   | 52.07 $\pm$ 4.09                   | 60.50 $\pm$ 5.33                   | 57.55 $\pm$ 3.22                   |
| ReAct [33]                        | 85.93 $\pm$ 0.83                   | 88.29 $\pm$ 0.44                   | 87.11 $\pm$ 0.61                   | 92.81 $\pm$ 3.03                   | 89.12 $\pm$ 3.19                   | 89.38 $\pm$ 1.49                   | 90.35 $\pm$ 0.78                   | 90.42 $\pm$ 1.41                   |
| MLS [12]                          | 86.31 $\pm$ 0.59                   | 88.72 $\pm$ 0.36                   | 87.52 $\pm$ 0.47                   | 94.15 $\pm$ 2.48                   | 91.69 $\pm$ 0.94                   | 89.41 $\pm$ 0.71                   | 89.14 $\pm$ 0.76                   | 91.10 $\pm$ 0.89                   |
| KLM [12]                          | 77.89 $\pm$ 0.75                   | 80.49 $\pm$ 0.85                   | 79.19 $\pm$ 0.80                   | 85.00 $\pm$ 2.04                   | 84.99 $\pm$ 1.18                   | 82.35 $\pm$ 0.33                   | 78.37 $\pm$ 0.33                   | 82.68 $\pm$ 0.21                   |
| VIM [39]                          | 87.75 $\pm$ 0.28                   | 89.62 $\pm$ 0.33                   | 88.68 $\pm$ 0.28                   | 94.76 $\pm$ 0.38                   | 94.50 $\pm$ 0.48                   | <b>95.15 <math>\pm</math> 0.34</b> | 89.49 $\pm$ 0.39                   | 93.48 $\pm$ 0.24                   |
| KNN [35]                          | <b>89.73 <math>\pm</math> 0.14</b> | 91.56 $\pm$ 0.26                   | 90.64 $\pm$ 0.20                   | 94.26 $\pm$ 0.38                   | 92.67 $\pm$ 0.30                   | 93.16 $\pm$ 0.24                   | <b>91.77 <math>\pm</math> 0.23</b> | 92.96 $\pm$ 0.14                   |
| DICE [34]                         | 77.01 $\pm$ 0.88                   | 79.67 $\pm$ 0.87                   | 78.34 $\pm$ 0.79                   | 90.37 $\pm$ 5.97                   | 90.02 $\pm$ 1.77                   | 81.86 $\pm$ 2.35                   | 74.67 $\pm$ 4.98                   | 84.23 $\pm$ 1.89                   |
| RankFeat [32]                     | 77.98 $\pm$ 2.24                   | 80.94 $\pm$ 2.80                   | 79.46 $\pm$ 2.52                   | 75.87 $\pm$ 5.22                   | 68.15 $\pm$ 7.44                   | 73.46 $\pm$ 6.49                   | 85.99 $\pm$ 3.04                   | 75.87 $\pm$ 5.06                   |
| ASH [8]                           | 74.11 $\pm$ 1.55                   | 76.44 $\pm$ 0.61                   | 75.27 $\pm$ 1.04                   | 83.16 $\pm$ 4.66                   | 73.46 $\pm$ 6.41                   | 77.45 $\pm$ 2.39                   | 79.89 $\pm$ 3.69                   | 78.49 $\pm$ 2.58                   |
| SHE [44]                          | 80.31 $\pm$ 0.69                   | 82.76 $\pm$ 0.43                   | 81.54 $\pm$ 0.51                   | 90.43 $\pm$ 4.76                   | 86.38 $\pm$ 1.32                   | 81.57 $\pm$ 1.21                   | 82.89 $\pm$ 1.22                   | 85.32 $\pm$ 1.43                   |
| GEN [25]                          | 87.21 $\pm$ 0.36                   | 89.20 $\pm$ 0.25                   | 88.20 $\pm$ 0.30                   | 93.83 $\pm$ 2.14                   | 91.97 $\pm$ 0.66                   | 90.14 $\pm$ 0.76                   | 89.46 $\pm$ 0.65                   | 91.35 $\pm$ 0.69                   |
| ExCeL [18]                        | 85.31 $\pm$ 0.26                   | 88.48 $\pm$ 0.19                   | 86.89 $\pm$ 0.23                   | <b>95.87 <math>\pm</math> 0.45</b> | 91.40 $\pm$ 1.43                   | 89.66 $\pm$ 0.64                   | 89.84 $\pm$ 0.41                   | 91.69 $\pm$ 0.18                   |
| Training methods without outliers |                                    |                                    |                                    |                                    |                                    |                                    |                                    |                                    |
| CRAFT (Ours)                      | <b>90.18 <math>\pm</math> 0.14</b> | <b>92.04 <math>\pm</math> 0.06</b> | <b>91.11 <math>\pm</math> 0.04</b> | 94.59 $\pm$ 0.02                   | 94.94 $\pm$ 1.10                   | 93.46 $\pm$ 0.29                   | <b>92.77 <math>\pm</math> 0.10</b> | 93.94 $\pm$ 0.20                   |
| ConfBranch [7]                    | 88.91 $\pm$ 0.25                   | 90.77 $\pm$ 0.25                   | 89.84 $\pm$ 0.24                   | 94.49 $\pm$ 0.77                   | <b>95.42 <math>\pm</math> 0.35</b> | 91.10 $\pm$ 0.41                   | 90.39 $\pm$ 0.40                   | 92.85 $\pm$ 0.29                   |
| G-ODIN [15]                       | 88.14 $\pm$ 0.60                   | 90.09 $\pm$ 0.54                   | 89.12 $\pm$ 0.57                   | <b>98.95 <math>\pm</math> 0.53</b> | <b>97.76 <math>\pm</math> 0.14</b> | <b>95.02 <math>\pm</math> 1.10</b> | 90.31 $\pm$ 0.65                   | <b>95.51 <math>\pm</math> 0.31</b> |
| CSI [36]                          | 88.16 $\pm$ 0.16                   | 90.87 $\pm$ 0.23                   | 89.51 $\pm$ 0.19                   | 92.55 $\pm$ 1.15                   | 95.18 $\pm$ 0.45                   | 90.71 $\pm$ 0.44                   | 89.56 $\pm$ 0.51                   | 92.00 $\pm$ 0.30                   |
| ARPL [4]                          | 86.76 $\pm$ 0.16                   | 88.12 $\pm$ 0.14                   | 87.44 $\pm$ 0.15                   | 92.62 $\pm$ 0.88                   | 87.69 $\pm$ 0.97                   | 88.57 $\pm$ 0.43                   | 88.39 $\pm$ 0.16                   | 89.31 $\pm$ 0.32                   |
| MOS [16]                          | 70.57 $\pm$ 3.04                   | 72.34 $\pm$ 3.16                   | 71.45 $\pm$ 3.09                   | 74.81 $\pm$ 10.1                   | 73.66 $\pm$ 9.14                   | 70.35 $\pm$ 3.11                   | 86.81 $\pm$ 1.85                   | 76.41 $\pm$ 5.93                   |
| LogitNorm [40]                    | <b>90.95 <math>\pm</math> 0.22</b> | <b>93.70 <math>\pm</math> 0.06</b> | <b>92.33 <math>\pm</math> 0.08</b> | <b>99.14 <math>\pm</math> 0.45</b> | <b>98.25 <math>\pm</math> 0.41</b> | <b>94.77 <math>\pm</math> 0.43</b> | <b>94.79 <math>\pm</math> 0.16</b> | <b>96.74 <math>\pm</math> 0.06</b> |
| CIDER [27]                        | 89.47 $\pm$ 0.19                   | <b>91.94 <math>\pm</math> 0.19</b> | <b>90.71 <math>\pm</math> 0.16</b> | 93.30 $\pm$ 1.08                   | <b>98.06 <math>\pm</math> 0.07</b> | 93.71 $\pm$ 0.39                   | <b>93.77 <math>\pm</math> 0.68</b> | <b>94.71 <math>\pm</math> 0.36</b> |
| Training methods with outliers    |                                    |                                    |                                    |                                    |                                    |                                    |                                    |                                    |
| OE [14]                           | <b>90.54 <math>\pm</math> 0.53</b> | <b>99.11 <math>\pm</math> 0.34</b> | <b>94.82 <math>\pm</math> 0.21</b> | 90.22 $\pm$ 1.31                   | <b>99.60 <math>\pm</math> 0.14</b> | <b>97.58 <math>\pm</math> 0.27</b> | <b>96.58 <math>\pm</math> 0.70</b> | <b>96.00 <math>\pm</math> 0.13</b> |
| MCD [43]                          | <b>89.88 <math>\pm</math> 0.07</b> | <b>92.18 <math>\pm</math> 0.18</b> | <b>91.03 <math>\pm</math> 0.12</b> | 84.22 $\pm$ 2.10                   | 93.76 $\pm$ 2.30                   | 93.35 $\pm$ 1.30                   | 92.66 $\pm$ 0.36                   | 91.00 $\pm$ 1.10                   |
| UDG [42]                          | 88.62 $\pm$ 0.32                   | 91.20 $\pm$ 0.20                   | 89.91 $\pm$ 0.25                   | <b>95.81 <math>\pm</math> 1.52</b> | 94.55 $\pm$ 2.27                   | <b>93.92 <math>\pm</math> 0.44</b> | 91.97 $\pm$ 0.41                   | <b>94.06 <math>\pm</math> 0.90</b> |
| MixOE [45]                        | 87.47 $\pm$ 0.97                   | 90.00 $\pm$ 0.73                   | 88.73 $\pm$ 0.82                   | 91.66 $\pm$ 2.21                   | 93.82 $\pm$ 1.27                   | 91.84 $\pm$ 0.51                   | 90.38 $\pm$ 0.55                   | 91.93 $\pm$ 0.69                   |

Table 9. FPR95 (% ↓) of various methods for different OOD datasets when CIFAR-100 is ID. For each column, the top five methods are marked in **bold**. *CRAFT ranks within the top five methods in all three near-OOD detection scenarios and in two out of five far-OOD detection scenarios.*

| Method                            | Near OOD            |                     |                     | Far OOD             |                     |                     | Average             |                     |
|-----------------------------------|---------------------|---------------------|---------------------|---------------------|---------------------|---------------------|---------------------|---------------------|
|                                   | CIFAR-10            | TIN                 | Average             | MNIST               | SVHN                | Textures            |                     | Places365           |
| Post-hoc inference methods        |                     |                     |                     |                     |                     |                     |                     |                     |
| OpenMax [1]                       | 60.17 ± 0.97        | 52.99 ± 0.51        | 56.58 ± 0.73        | 53.82 ± 4.74        | 53.20 ± 1.78        | 56.12 ± 1.91        | <b>54.85 ± 1.42</b> | 54.50 ± 0.68        |
| MSP [13]                          | <b>58.91 ± 0.93</b> | 50.70 ± 0.34        | <b>54.80 ± 0.33</b> | 57.23 ± 4.68        | 59.07 ± 2.53        | 61.88 ± 1.28        | 56.62 ± 0.87        | 58.70 ± 1.06        |
| TempScale [10]                    | <b>58.72 ± 0.81</b> | 50.26 ± 0.16        | <b>54.49 ± 0.48</b> | 56.05 ± 4.61        | 57.71 ± 2.68        | 61.56 ± 1.43        | 56.46 ± 0.94        | 57.94 ± 1.14        |
| ODIN [23]                         | 60.64 ± 0.56        | 55.19 ± 0.57        | 57.91 ± 0.51        | <b>45.94 ± 3.29</b> | 67.41 ± 3.88        | 62.37 ± 2.96        | 59.71 ± 0.92        | 58.86 ± 0.79        |
| MDS [22]                          | 88.00 ± 0.49        | 79.05 ± 1.22        | 83.53 ± 0.60        | 71.72 ± 2.94        | 67.21 ± 6.09        | 70.49 ± 2.48        | 79.61 ± 0.34        | 72.26 ± 1.56        |
| MDSEns [22]                       | 95.94 ± 0.16        | 95.82 ± 0.12        | 95.88 ± 0.04        | <b>2.83 ± 0.86</b>  | 82.57 ± 2.58        | 84.94 ± 0.83        | 96.61 ± 0.17        | 66.74 ± 1.04        |
| RMDS [29]                         | 61.37 ± 0.24        | 49.56 ± 0.90        | 55.46 ± 0.41        | 52.05 ± 6.28        | 51.65 ± 3.68        | <b>53.99 ± 1.06</b> | <b>53.57 ± 0.43</b> | <b>52.81 ± 0.63</b> |
| Gram [31]                         | 92.71 ± 0.64        | 91.85 ± 0.86        | 92.28 ± 0.29        | 53.53 ± 7.45        | <b>20.06 ± 1.96</b> | 89.51 ± 2.54        | 94.67 ± 0.60        | 64.44 ± 2.37        |
| EBO [24]                          | 59.21 ± 0.75        | 52.03 ± 0.50        | 55.62 ± 0.61        | 52.62 ± 3.83        | 53.62 ± 3.14        | 62.35 ± 2.06        | 57.75 ± 0.86        | 56.59 ± 1.38        |
| OpenGAN [19]                      | 78.83 ± 3.94        | 74.21 ± 1.25        | 76.52 ± 2.59        | 63.09 ± 23.3        | 70.35 ± 2.06        | 74.77 ± 1.78        | 73.75 ± 8.32        | 70.49 ± 7.38        |
| GradNorm [17]                     | 84.30 ± 0.36        | 86.85 ± 0.62        | 85.58 ± 0.46        | 86.97 ± 1.44        | 69.90 ± 7.94        | 92.51 ± 0.61        | 85.32 ± 0.44        | 83.68 ± 1.92        |
| ReAct [33]                        | 61.30 ± 0.43        | 51.47 ± 0.47        | 56.39 ± 0.34        | 56.04 ± 5.66        | 50.41 ± 2.02        | 55.04 ± 0.82        | <b>55.30 ± 0.41</b> | 54.20 ± 1.56        |
| MLS [12]                          | <b>59.11 ± 0.64</b> | 51.83 ± 0.70        | 55.47 ± 0.66        | 52.95 ± 3.82        | 53.90 ± 3.04        | 62.39 ± 2.13        | 57.68 ± 0.91        | 56.73 ± 1.33        |
| KLM [12]                          | 84.77 ± 2.95        | 71.07 ± 0.59        | 77.92 ± 1.31        | 73.09 ± 6.67        | 50.30 ± 7.04        | 81.80 ± 5.80        | 81.40 ± 1.58        | 71.65 ± 2.01        |
| VIM [39]                          | 70.59 ± 0.43        | 54.66 ± 0.42        | 62.63 ± 0.27        | 48.32 ± 1.07        | <b>46.22 ± 5.46</b> | <b>46.86 ± 2.29</b> | 61.57 ± 0.77        | <b>50.74 ± 1.00</b> |
| KNN [35]                          | 72.80 ± 0.44        | 49.65 ± 0.37        | 61.22 ± 0.14        | 48.58 ± 4.67        | 51.75 ± 3.12        | <b>53.56 ± 2.32</b> | 60.70 ± 1.03        | 53.65 ± 0.28        |
| DICE [34]                         | 60.98 ± 1.10        | 54.93 ± 0.53        | 57.95 ± 0.53        | 51.79 ± 3.67        | 49.58 ± 3.32        | 64.23 ± 1.65        | 59.39 ± 1.25        | 56.25 ± 0.60        |
| RankFeat [32]                     | 82.78 ± 1.56        | 78.40 ± 0.95        | 80.59 ± 1.10        | 75.01 ± 5.83        | 58.49 ± 2.30        | 66.87 ± 3.80        | 77.42 ± 1.96        | 69.45 ± 1.01        |
| ASH [8]                           | 68.06 ± 0.44        | 63.35 ± 0.90        | 65.71 ± 0.24        | 66.58 ± 3.88        | 46.00 ± 2.67        | 61.27 ± 2.74        | 62.95 ± 0.99        | 59.20 ± 2.46        |
| SHE [44]                          | 60.41 ± 0.51        | 57.74 ± 0.73        | 59.07 ± 0.25        | 58.78 ± 2.70        | 59.15 ± 7.61        | 73.29 ± 3.22        | 65.24 ± 0.98        | 64.12 ± 2.70        |
| GEN [25]                          | <b>58.87 ± 0.69</b> | 49.98 ± 0.05        | <b>54.42 ± 0.33</b> | 53.92 ± 5.71        | 55.45 ± 2.76        | 61.23 ± 1.40        | 56.25 ± 1.01        | 56.71 ± 1.59        |
| ExCeL [18]                        | 61.07 ± 0.81        | <b>49.35 ± 0.31</b> | 55.21 ± 0.56        | 54.67 ± 5.86        | <b>45.13 ± 0.33</b> | <b>51.14 ± 0.14</b> | 58.02 ± 1.28        | <b>52.24 ± 1.90</b> |
| Training methods without outliers |                     |                     |                     |                     |                     |                     |                     |                     |
| CRAFT (Ours)                      | <b>59.19 ± 0.64</b> | <b>48.26 ± 1.21</b> | <b>53.73 ± 0.62</b> | 48.95 ± 1.90        | 47.50 ± 5.22        | 56.97 ± 1.77        | <b>54.02 ± 0.30</b> | <b>51.86 ± 0.49</b> |
| ConfBranch [7]                    | 74.56 ± 1.22        | 65.86 ± 0.56        | 70.21 ± 0.83        | 55.95 ± 6.15        | 76.01 ± 12.3        | 85.43 ± 1.17        | 69.90 ± 0.28        | 71.82 ± 3.39        |
| G-ODIN [15]                       | 78.82 ± 1.86        | 56.34 ± 0.45        | 67.58 ± 0.98        | <b>27.19 ± 6.24</b> | <b>42.68 ± 5.74</b> | <b>35.83 ± 1.15</b> | 65.03 ± 1.16        | <b>42.68 ± 3.19</b> |
| CSI [36]                          | 72.62 ± 0.49        | 67.90 ± 0.64        | 70.26 ± 0.56        | 80.54 ± 4.87        | 67.21 ± 3.35        | 90.51 ± 1.47        | 69.41 ± 0.58        | 76.92 ± 1.29        |
| ARPL [4]                          | 64.84 ± 1.25        | 58.27 ± 2.40        | 61.56 ± 1.81        | 59.12 ± 8.04        | 59.76 ± 1.58        | 71.66 ± 1.81        | 62.01 ± 0.89        | 63.14 ± 2.53        |
| MOS [16]                          | 60.60 ± 1.47        | 51.49 ± 0.69        | 56.05 ± 1.01        | 52.70 ± 3.81        | 56.33 ± 8.46        | 61.24 ± 2.06        | 58.86 ± 0.41        | 57.28 ± 3.29        |
| LogitNorm [40]                    | 73.88 ± 1.21        | 51.89 ± 0.10        | 62.89 ± 0.57        | <b>34.12 ± 8.32</b> | 47.52 ± 8.02        | 77.38 ± 2.99        | 55.44 ± 1.45        | 53.61 ± 3.45        |
| CIDER [27]                        | 82.71 ± 1.25        | 61.33 ± 0.64        | 72.02 ± 0.31        | 75.32 ± 4.21        | <b>17.82 ± 2.80</b> | 54.43 ± 2.56        | 69.30 ± 1.81        | 54.22 ± 1.24        |
| Training methods with outliers    |                     |                     |                     |                     |                     |                     |                     |                     |
| OE [14]                           | 61.26 ± 0.22        | <b>0.21 ± 0.01</b>  | <b>30.73 ± 0.11</b> | 53.31 ± 9.91        | 51.84 ± 3.45        | 55.83 ± 1.82        | 58.30 ± 0.72        | 54.82 ± 2.79        |
| MCD [43]                          | 62.65 ± 0.54        | <b>49.10 ± 1.29</b> | 55.88 ± 0.85        | 62.78 ± 2.91        | <b>43.71 ± 3.73</b> | 56.89 ± 0.64        | <b>54.17 ± 1.13</b> | 54.39 ± 1.34        |
| UDG [42]                          | 66.40 ± 0.51        | 56.43 ± 0.68        | 61.42 ± 0.48        | <b>45.14 ± 12.8</b> | 59.67 ± 5.62        | 71.33 ± 3.59        | 59.85 ± 0.57        | 59.00 ± 3.35        |
| MixOE [45]                        | 61.12 ± 1.08        | <b>49.32 ± 0.36</b> | 55.22 ± 0.49        | 59.49 ± 7.74        | 73.09 ± 4.00        | 66.04 ± 0.98        | 56.93 ± 0.78        | 63.88 ± 2.48        |

Table 10. AUROC (%  $\uparrow$ ) of various methods for different OOD datasets when CIFAR-100 is ID. For each column, the top five methods are marked in **bold**. *CRAFT ranks within the top five methods in one out of three near-OOD detection scenarios and in three out of five far-OOD detection scenarios.*

| Method                            | Near OOD                           |                                    |                                    | Far OOD                            |                                    | Average                            |                                    |                                    |
|-----------------------------------|------------------------------------|------------------------------------|------------------------------------|------------------------------------|------------------------------------|------------------------------------|------------------------------------|------------------------------------|
|                                   | CIFAR-10                           | TIN                                | Average                            | MNIST                              | SVHN                               | Textures                           | Places365                          |                                    |
| Post-hoc inference methods        |                                    |                                    |                                    |                                    |                                    |                                    |                                    |                                    |
| OpenMax [1]                       | 74.38 $\pm$ 0.37                   | 78.44 $\pm$ 0.14                   | 76.41 $\pm$ 0.25                   | 76.01 $\pm$ 1.39                   | 82.07 $\pm$ 1.53                   | 80.56 $\pm$ 0.09                   | 79.29 $\pm$ 0.40                   | 79.48 $\pm$ 0.41                   |
| MSP [13]                          | 78.47 $\pm$ 0.07                   | 82.07 $\pm$ 0.17                   | 80.27 $\pm$ 0.11                   | 76.08 $\pm$ 1.86                   | 78.42 $\pm$ 0.89                   | 77.32 $\pm$ 0.71                   | 79.22 $\pm$ 0.29                   | 77.76 $\pm$ 0.44                   |
| TempScale [10]                    | <b>79.02 <math>\pm</math> 0.06</b> | 82.79 $\pm$ 0.09                   | 80.90 $\pm$ 0.07                   | 77.27 $\pm$ 1.85                   | 79.79 $\pm$ 1.05                   | 78.11 $\pm$ 0.72                   | 79.80 $\pm$ 0.25                   | 78.74 $\pm$ 0.51                   |
| ODIN [23]                         | 78.18 $\pm$ 0.14                   | 81.63 $\pm$ 0.08                   | 79.90 $\pm$ 0.11                   | <b>83.79 <math>\pm</math> 1.31</b> | 74.54 $\pm$ 0.76                   | 79.33 $\pm$ 1.08                   | 79.45 $\pm$ 0.26                   | 79.28 $\pm$ 0.21                   |
| MDS [22]                          | 55.87 $\pm$ 0.22                   | 61.50 $\pm$ 0.28                   | 58.69 $\pm$ 0.09                   | 67.47 $\pm$ 0.81                   | 70.68 $\pm$ 6.40                   | 76.26 $\pm$ 0.69                   | 63.15 $\pm$ 0.49                   | 69.39 $\pm$ 1.39                   |
| MDSEns [22]                       | 43.85 $\pm$ 0.31                   | 48.78 $\pm$ 0.19                   | 46.31 $\pm$ 0.24                   | <b>98.21 <math>\pm</math> 0.78</b> | 53.76 $\pm$ 1.63                   | 69.75 $\pm$ 1.14                   | 42.27 $\pm$ 0.73                   | 66.00 $\pm$ 0.69                   |
| RMDS [29]                         | 77.75 $\pm$ 0.19                   | 82.55 $\pm$ 0.02                   | 80.15 $\pm$ 0.11                   | 79.74 $\pm$ 2.49                   | 84.89 $\pm$ 1.10                   | <b>83.65 <math>\pm</math> 0.51</b> | <b>83.40 <math>\pm</math> 0.46</b> | <b>82.92 <math>\pm</math> 0.42</b> |
| Gram [31]                         | 49.41 $\pm$ 0.58                   | 53.91 $\pm$ 1.58                   | 51.66 $\pm$ 0.77                   | 80.71 $\pm$ 4.15                   | <b>95.55 <math>\pm</math> 0.60</b> | 70.79 $\pm$ 1.32                   | 46.38 $\pm$ 1.21                   | 73.36 $\pm$ 1.08                   |
| EBO [24]                          | <b>79.05 <math>\pm</math> 0.11</b> | 82.76 $\pm$ 0.08                   | <b>80.91 <math>\pm</math> 0.08</b> | 79.18 $\pm$ 1.37                   | 82.03 $\pm$ 1.74                   | 78.35 $\pm$ 0.83                   | 79.52 $\pm$ 0.23                   | 79.77 $\pm$ 0.61                   |
| OpenGAN [19]                      | 63.23 $\pm$ 2.44                   | 68.74 $\pm$ 2.29                   | 65.98 $\pm$ 1.26                   | 68.14 $\pm$ 18.8                   | 68.40 $\pm$ 2.15                   | 65.84 $\pm$ 3.43                   | 69.13 $\pm$ 7.08                   | 67.88 $\pm$ 7.16                   |
| GradNorm [17]                     | 70.32 $\pm$ 0.20                   | 69.95 $\pm$ 0.79                   | 70.13 $\pm$ 0.47                   | 65.35 $\pm$ 1.12                   | 76.95 $\pm$ 4.73                   | 64.58 $\pm$ 0.13                   | 69.69 $\pm$ 0.17                   | 69.14 $\pm$ 1.05                   |
| ReAct [33]                        | 78.65 $\pm$ 0.05                   | 82.88 $\pm$ 0.08                   | 80.77 $\pm$ 0.05                   | 78.37 $\pm$ 1.59                   | 83.01 $\pm$ 0.97                   | 80.15 $\pm$ 0.46                   | <b>80.03 <math>\pm</math> 0.11</b> | 80.39 $\pm$ 0.49                   |
| MLS [12]                          | <b>79.21 <math>\pm</math> 0.10</b> | 82.90 $\pm$ 0.05                   | <b>81.05 <math>\pm</math> 0.07</b> | 78.91 $\pm$ 1.47                   | 81.65 $\pm$ 1.49                   | 78.39 $\pm$ 0.84                   | 79.75 $\pm$ 0.24                   | 79.67 $\pm$ 0.57                   |
| KLM [12]                          | 73.91 $\pm$ 0.25                   | 79.22 $\pm$ 0.28                   | 76.56 $\pm$ 0.25                   | 74.15 $\pm$ 2.59                   | 79.34 $\pm$ 0.44                   | 75.77 $\pm$ 0.45                   | 75.70 $\pm$ 0.24                   | 76.24 $\pm$ 0.52                   |
| VIM [39]                          | 72.21 $\pm$ 0.41                   | 77.76 $\pm$ 0.16                   | 74.98 $\pm$ 0.13                   | 81.89 $\pm$ 1.02                   | 83.14 $\pm$ 3.71                   | <b>85.91 <math>\pm</math> 0.78</b> | 75.85 $\pm$ 0.37                   | 81.70 $\pm$ 0.62                   |
| KNN [35]                          | 77.02 $\pm$ 0.25                   | <b>83.34 <math>\pm</math> 0.16</b> | 80.18 $\pm$ 0.15                   | 82.36 $\pm$ 1.52                   | 84.15 $\pm$ 1.09                   | <b>83.66 <math>\pm</math> 0.83</b> | 79.43 $\pm$ 0.47                   | <b>82.40 <math>\pm</math> 0.17</b> |
| DICE [34]                         | 78.04 $\pm$ 0.32                   | 80.72 $\pm$ 0.30                   | 79.38 $\pm$ 0.23                   | 79.86 $\pm$ 1.89                   | 84.22 $\pm$ 2.00                   | 77.63 $\pm$ 0.34                   | 78.33 $\pm$ 0.66                   | 80.01 $\pm$ 0.18                   |
| RankFeat [32]                     | 58.04 $\pm$ 2.36                   | 65.72 $\pm$ 0.22                   | 61.88 $\pm$ 1.28                   | 63.03 $\pm$ 3.86                   | 72.14 $\pm$ 1.39                   | 69.40 $\pm$ 3.08                   | 63.82 $\pm$ 1.83                   | 67.10 $\pm$ 1.42                   |
| ASH [8]                           | 76.48 $\pm$ 0.30                   | 79.92 $\pm$ 0.20                   | 78.20 $\pm$ 0.15                   | 77.23 $\pm$ 0.46                   | <b>85.60 <math>\pm</math> 1.40</b> | 80.72 $\pm$ 0.70                   | 78.76 $\pm$ 0.16                   | 80.58 $\pm$ 0.66                   |
| SHE [44]                          | 78.15 $\pm$ 0.03                   | 79.74 $\pm$ 0.36                   | 78.95 $\pm$ 0.18                   | 76.76 $\pm$ 1.07                   | 80.97 $\pm$ 3.98                   | 73.64 $\pm$ 1.28                   | 76.30 $\pm$ 0.51                   | 76.92 $\pm$ 1.16                   |
| GEN [25]                          | <b>79.38 <math>\pm</math> 0.04</b> | <b>83.25 <math>\pm</math> 0.13</b> | <b>81.31 <math>\pm</math> 0.08</b> | 78.29 $\pm$ 2.05                   | 81.41 $\pm$ 1.50                   | 78.74 $\pm$ 0.81                   | <b>80.28 <math>\pm</math> 0.27</b> | 79.68 $\pm$ 0.75                   |
| ExCeL [18]                        | 78.14 $\pm$ 0.09                   | <b>83.26 <math>\pm</math> 0.03</b> | 80.70 $\pm$ 0.06                   | 78.99 $\pm$ 1.73                   | <b>85.91 <math>\pm</math> 0.73</b> | <b>83.28 <math>\pm</math> 0.58</b> | 79.98 $\pm$ 0.57                   | <b>82.04 <math>\pm</math> 0.90</b> |
| Training methods without outliers |                                    |                                    |                                    |                                    |                                    |                                    |                                    |                                    |
| CRAFT (Ours)                      | <b>78.67 <math>\pm</math> 0.21</b> | 83.14 $\pm$ 0.73                   | 80.90 $\pm$ 0.33                   | 80.34 $\pm$ 1.84                   | <b>85.16 <math>\pm</math> 1.15</b> | 80.91 $\pm$ 0.45                   | <b>81.71 <math>\pm</math> 0.12</b> | <b>82.03 <math>\pm</math> 0.34</b> |
| ConfBranch [7]                    | 68.80 $\pm$ 0.73                   | 74.41 $\pm$ 0.54                   | 71.60 $\pm$ 0.62                   | 74.29 $\pm$ 4.44                   | 65.51 $\pm$ 8.07                   | 65.39 $\pm$ 0.16                   | 70.42 $\pm$ 0.26                   | 68.90 $\pm$ 1.83                   |
| G-ODIN [15]                       | 73.04 $\pm$ 0.39                   | 81.26 $\pm$ 0.29                   | 77.15 $\pm$ 0.28                   | <b>91.15 <math>\pm</math> 2.86</b> | 83.74 $\pm$ 3.10                   | <b>89.62 <math>\pm</math> 0.36</b> | 78.17 $\pm$ 0.62                   | <b>85.67 <math>\pm</math> 1.58</b> |
| CSI [36]                          | 69.50 $\pm$ 0.43                   | 73.40 $\pm$ 0.13                   | 71.45 $\pm$ 0.27                   | 51.79 $\pm$ 6.77                   | 80.24 $\pm$ 1.80                   | 62.22 $\pm$ 0.98                   | 70.99 $\pm$ 0.54                   | 66.31 $\pm$ 1.21                   |
| ARPL [4]                          | 73.38 $\pm$ 0.78                   | 76.50 $\pm$ 1.11                   | 74.94 $\pm$ 0.93                   | 73.77 $\pm$ 5.89                   | 76.45 $\pm$ 1.00                   | 69.93 $\pm$ 1.33                   | 74.62 $\pm$ 0.57                   | 73.69 $\pm$ 1.80                   |
| MOS [16]                          | 78.54 $\pm$ 0.13                   | 82.26 $\pm$ 0.25                   | 80.40 $\pm$ 0.18                   | 80.68 $\pm$ 1.65                   | 81.59 $\pm$ 3.81                   | 79.92 $\pm$ 0.57                   | 78.50 $\pm$ 0.34                   | 80.17 $\pm$ 1.21                   |
| LogitNorm [40]                    | 74.57 $\pm$ 0.39                   | 82.37 $\pm$ 0.24                   | 78.47 $\pm$ 0.31                   | <b>90.69 <math>\pm</math> 1.38</b> | 82.80 $\pm$ 4.57                   | 72.37 $\pm$ 0.67                   | <b>80.25 <math>\pm</math> 0.61</b> | 81.53 $\pm$ 1.26                   |
| CIDER [27]                        | 67.55 $\pm$ 0.60                   | 78.65 $\pm$ 0.35                   | 73.10 $\pm$ 0.39                   | 68.14 $\pm$ 3.98                   | <b>97.17 <math>\pm</math> 0.34</b> | 82.21 $\pm$ 1.93                   | 74.43 $\pm$ 0.64                   | 80.49 $\pm$ 0.68                   |
| Training methods with outliers    |                                    |                                    |                                    |                                    |                                    |                                    |                                    |                                    |
| OE [14]                           | 76.70 $\pm$ 0.19                   | <b>99.89 <math>\pm</math> 0.02</b> | <b>88.30 <math>\pm</math> 0.10</b> | 80.68 $\pm$ 5.82                   | 84.37 $\pm$ 1.34                   | 82.18 $\pm$ 0.68                   | 78.39 $\pm$ 0.41                   | 81.41 $\pm$ 1.49                   |
| MCD [43]                          | 75.40 $\pm$ 0.46                   | 78.75 $\pm$ 0.21                   | 77.07 $\pm$ 0.32                   | 68.25 $\pm$ 1.99                   | 75.92 $\pm$ 0.37                   | 77.07 $\pm$ 0.76                   | 77.65 $\pm$ 0.09                   | 74.72 $\pm$ 0.78                   |
| UDG [42]                          | 75.15 $\pm$ 0.15                   | 80.90 $\pm$ 0.21                   | 78.02 $\pm$ 0.10                   | <b>83.88 <math>\pm</math> 5.98</b> | 79.80 $\pm$ 1.61                   | 75.57 $\pm$ 0.80                   | 79.11 $\pm$ 0.17                   | 79.59 $\pm$ 1.77                   |
| MixOE [45]                        | 78.17 $\pm$ 0.29                   | <b>83.73 <math>\pm</math> 0.12</b> | <b>80.95 <math>\pm</math> 0.20</b> | 76.06 $\pm$ 5.52                   | 72.28 $\pm$ 0.81                   | 77.34 $\pm$ 0.91                   | 79.92 $\pm$ 0.30                   | 76.40 $\pm$ 1.44                   |

Table 11. FPR95 (%  $\downarrow$ ) of various methods for different OOD datasets when ImageNet-200 is ID. For each column, the top five methods are marked in **bold**. Note that N/A indicates that results are not reported in OpenOOD. *CRAFT* ranks within the top five methods in two out of three near-OOD detection scenarios.

| Method                            | Near OOD                           |                                    |                                    | Far OOD                            |                                    |                                    |                                    |
|-----------------------------------|------------------------------------|------------------------------------|------------------------------------|------------------------------------|------------------------------------|------------------------------------|------------------------------------|
|                                   | SSB-hard                           | NINCO                              | Average                            | iNaturalist                        | Textures                           | OpenImage-O                        | Average                            |
| Post-hoc inference methods        |                                    |                                    |                                    |                                    |                                    |                                    |                                    |
| OpenMax [1]                       | 72.37 $\pm$ 0.11                   | 54.59 $\pm$ 0.54                   | 63.48 $\pm$ 0.25                   | 24.53 $\pm$ 0.96                   | 36.80 $\pm$ 0.55                   | 38.03 $\pm$ 0.49                   | 33.12 $\pm$ 0.66                   |
| MSP [13]                          | <b>66.00 <math>\pm</math> 0.10</b> | 43.65 $\pm$ 0.75                   | <b>54.82 <math>\pm</math> 0.35</b> | 26.48 $\pm$ 0.73                   | 44.58 $\pm$ 0.68                   | 35.23 $\pm$ 0.18                   | 35.43 $\pm$ 0.38                   |
| TempScale [10]                    | 66.43 $\pm$ 0.26                   | <b>43.21 <math>\pm</math> 0.70</b> | <b>54.82 <math>\pm</math> 0.23</b> | 24.39 $\pm$ 0.79                   | 43.57 $\pm$ 0.77                   | 34.04 $\pm$ 0.31                   | 34.00 $\pm$ 0.37                   |
| ODIN [23]                         | 73.51 $\pm$ 0.38                   | 60.00 $\pm$ 0.80                   | 66.76 $\pm$ 0.26                   | <b>22.39 <math>\pm</math> 1.87</b> | 42.99 $\pm$ 1.56                   | 37.30 $\pm$ 0.59                   | 34.23 $\pm$ 1.05                   |
| MDS [22]                          | 83.65 $\pm$ 0.47                   | 74.57 $\pm$ 0.15                   | 79.11 $\pm$ 0.31                   | 58.53 $\pm$ 0.75                   | 58.16 $\pm$ 0.84                   | 68.29 $\pm$ 0.28                   | 61.66 $\pm$ 0.27                   |
| MDSEns [22]                       | 92.13 $\pm$ 0.05                   | 91.36 $\pm$ 0.16                   | 91.75 $\pm$ 0.10                   | 83.37 $\pm$ 0.70                   | 72.27 $\pm$ 0.48                   | 87.26 $\pm$ 0.10                   | 80.96 $\pm$ 0.38                   |
| RMDS [29]                         | <b>65.91 <math>\pm</math> 0.27</b> | <b>42.13 <math>\pm</math> 1.04</b> | <b>54.02 <math>\pm</math> 0.58</b> | 24.70 $\pm$ 0.90                   | 37.80 $\pm$ 1.32                   | 34.85 $\pm$ 0.31                   | 32.45 $\pm$ 0.79                   |
| Gram [31]                         | 85.68 $\pm$ 0.85                   | 87.13 $\pm$ 1.89                   | 86.40 $\pm$ 1.21                   | 85.54 $\pm$ 0.40                   | 80.87 $\pm$ 1.20                   | 86.66 $\pm$ 1.27                   | 84.36 $\pm$ 0.78                   |
| EBO [24]                          | 69.77 $\pm$ 0.32                   | 50.70 $\pm$ 0.89                   | 60.24 $\pm$ 0.57                   | 26.41 $\pm$ 2.29                   | 41.43 $\pm$ 1.85                   | 36.74 $\pm$ 1.14                   | 34.86 $\pm$ 1.30                   |
| OpenGAN [19]                      | 88.07 $\pm$ 2.23                   | 80.23 $\pm$ 5.71                   | 84.15 $\pm$ 3.85                   | 60.13 $\pm$ 9.79                   | 66.00 $\pm$ 9.97                   | 66.34 $\pm$ 8.44                   | 64.16 $\pm$ 9.33                   |
| GradNorm [17]                     | 82.17 $\pm$ 0.62                   | 83.17 $\pm$ 0.21                   | 82.67 $\pm$ 0.30                   | 61.31 $\pm$ 2.86                   | 66.88 $\pm$ 3.59                   | 71.16 $\pm$ 0.23                   | 66.45 $\pm$ 0.22                   |
| ReAct [33]                        | 71.51 $\pm$ 1.92                   | 53.47 $\pm$ 2.46                   | 62.49 $\pm$ 2.19                   | 22.97 $\pm$ 2.25                   | <b>29.67 <math>\pm</math> 1.35</b> | <b>32.86 <math>\pm</math> 0.74</b> | 28.50 $\pm$ 0.95                   |
| MLS [12]                          | 69.64 $\pm$ 0.37                   | 49.87 $\pm$ 0.94                   | 59.76 $\pm$ 0.59                   | 25.09 $\pm$ 2.04                   | 41.25 $\pm$ 1.86                   | 35.76 $\pm$ 0.74                   | 34.03 $\pm$ 1.21                   |
| KLM [12]                          | 78.19 $\pm$ 2.30                   | 62.33 $\pm$ 2.66                   | 70.26 $\pm$ 0.64                   | 26.66 $\pm$ 1.61                   | 50.24 $\pm$ 1.26                   | 45.81 $\pm$ 0.59                   | 40.90 $\pm$ 1.08                   |
| VIM [39]                          | 71.28 $\pm$ 0.49                   | 47.10 $\pm$ 1.10                   | 59.19 $\pm$ 0.71                   | 27.34 $\pm$ 0.38                   | <b>20.39 <math>\pm</math> 0.17</b> | 33.86 $\pm$ 0.63                   | <b>27.20 <math>\pm</math> 0.30</b> |
| KNN [35]                          | 73.71 $\pm$ 0.31                   | 46.64 $\pm$ 0.73                   | 60.18 $\pm$ 0.52                   | 24.46 $\pm$ 1.06                   | <b>24.45 <math>\pm</math> 0.29</b> | 32.90 $\pm$ 1.12                   | <b>27.27 <math>\pm</math> 0.75</b> |
| DICE [34]                         | 70.84 $\pm$ 0.30                   | 52.91 $\pm$ 1.20                   | 61.88 $\pm$ 0.67                   | 29.66 $\pm$ 2.62                   | 40.96 $\pm$ 1.87                   | 38.91 $\pm$ 1.16                   | 36.51 $\pm$ 1.18                   |
| RankFeat [32]                     | 90.79 $\pm$ 0.37                   | 93.32 $\pm$ 0.11                   | 92.06 $\pm$ 0.23                   | 98.00 $\pm$ 0.80                   | 99.40 $\pm$ 0.68                   | 95.77 $\pm$ 0.85                   | 97.72 $\pm$ 0.75                   |
| ASH [8]                           | 72.14 $\pm$ 0.97                   | 57.63 $\pm$ 0.98                   | 64.89 $\pm$ 0.90                   | 22.49 $\pm$ 2.24                   | <b>25.65 <math>\pm</math> 0.80</b> | 33.72 $\pm$ 0.97                   | <b>27.29 <math>\pm</math> 1.12</b> |
| SHEN [44]                         | 72.64 $\pm$ 0.30                   | 60.96 $\pm$ 1.33                   | 66.80 $\pm$ 0.74                   | 34.38 $\pm$ 3.48                   | 45.58 $\pm$ 2.42                   | 46.54 $\pm$ 1.34                   | 42.17 $\pm$ 1.24                   |
| GEN [25]                          | 66.79 $\pm$ 0.26                   | <b>43.61 <math>\pm</math> 0.61</b> | 55.20 $\pm$ 0.20                   | <b>22.03 <math>\pm</math> 0.98</b> | 42.01 $\pm$ 0.92                   | <b>32.25 <math>\pm</math> 0.31</b> | 32.10 $\pm$ 0.59                   |
| ExCeL [18]                        | 69.28 $\pm$ 0.60                   | 46.51 $\pm$ 0.20                   | 57.90 $\pm$ 0.40                   | <b>22.29 <math>\pm</math> 1.00</b> | 30.14 $\pm$ 0.64                   | 32.91 $\pm$ 0.76                   | <b>28.45 <math>\pm</math> 0.80</b> |
| Training methods without outliers |                                    |                                    |                                    |                                    |                                    |                                    |                                    |
| CRAFT (Ours)                      | 69.07 $\pm$ 0.39                   | <b>40.40 <math>\pm</math> 1.13</b> | <b>54.62 <math>\pm</math> 0.57</b> | 24.89 $\pm$ 1.33                   | 38.73 $\pm$ 4.55                   | 33.48 $\pm$ 1.74                   | 32.67 $\pm$ 1.13                   |
| ConfBranch [7]                    | 72.24 $\pm$ 0.37                   | 50.63 $\pm$ 0.60                   | 61.44 $\pm$ 0.34                   | 23.84 $\pm$ 0.40                   | 42.42 $\pm$ 2.27                   | 37.99 $\pm$ 0.09                   | 34.75 $\pm$ 0.63                   |
| G-ODIN [15]                       | 78.23 $\pm$ 0.70                   | 61.52 $\pm$ 0.64                   | 69.87 $\pm$ 0.46                   | 26.13 $\pm$ 0.77                   | <b>28.98 <math>\pm</math> 1.15</b> | 35.43 $\pm$ 0.43                   | 30.18 $\pm$ 0.49                   |
| CSI [36]                          | N/A                                |
| ARPL [4]                          | <b>65.73 <math>\pm</math> 0.51</b> | 45.75 $\pm$ 0.89                   | 55.74 $\pm$ 0.70                   | 29.32 $\pm$ 0.64                   | 42.87 $\pm$ 1.09                   | 37.20 $\pm$ 0.69                   | 36.46 $\pm$ 0.08                   |
| MOS [16]                          | 74.35 $\pm$ 0.32                   | 68.85 $\pm$ 0.68                   | 71.60 $\pm$ 0.48                   | 49.55 $\pm$ 0.73                   | 51.27 $\pm$ 1.02                   | 53.86 $\pm$ 0.30                   | 51.56 $\pm$ 0.42                   |
| LogitNorm [40]                    | 67.46 $\pm$ 0.21                   | 45.46 $\pm$ 0.69                   | 56.46 $\pm$ 0.37                   | <b>15.70 <math>\pm</math> 0.61</b> | 32.13 $\pm$ 0.67                   | <b>30.49 <math>\pm</math> 0.62</b> | <b>26.11 <math>\pm</math> 0.52</b> |
| CIDER [27]                        | 75.50 $\pm$ 0.68                   | 44.69 $\pm$ 0.88                   | 60.10 $\pm$ 0.73                   | 26.54 $\pm$ 2.27                   | 31.51 $\pm$ 3.68                   | <b>32.47 <math>\pm</math> 2.40</b> | 30.17 $\pm$ 2.75                   |
| Training methods with outliers    |                                    |                                    |                                    |                                    |                                    |                                    |                                    |
| OE [14]                           | <b>64.67 <math>\pm</math> 0.25</b> | <b>39.93 <math>\pm</math> 1.13</b> | <b>52.30 <math>\pm</math> 0.67</b> | 27.03 $\pm$ 0.47                   | 41.92 $\pm$ 1.69                   | 33.56 $\pm$ 0.46                   | 34.17 $\pm$ 0.56                   |
| MCD [43]                          | <b>65.69 <math>\pm</math> 0.36</b> | 43.74 $\pm$ 1.32                   | <b>54.71 <math>\pm</math> 0.83</b> | <b>21.74 <math>\pm</math> 0.31</b> | 38.11 $\pm$ 0.93                   | <b>29.93 <math>\pm</math> 0.19</b> | 29.93 $\pm$ 0.30                   |
| UDG [42]                          | 75.84 $\pm$ 1.86                   | 61.94 $\pm$ 1.61                   | 68.89 $\pm$ 1.72                   | 49.26 $\pm$ 7.88                   | 71.94 $\pm$ 5.25                   | 64.92 $\pm$ 5.07                   | 62.04 $\pm$ 5.99                   |
| MixOE [45]                        | 68.26 $\pm$ 0.48                   | 47.69 $\pm$ 0.95                   | 57.97 $\pm$ 0.40                   | 30.84 $\pm$ 0.45                   | 51.44 $\pm$ 0.61                   | 40.51 $\pm$ 1.06                   | 40.93 $\pm$ 0.29                   |



Table 12. AUROC (%  $\uparrow$ ) of various methods for different OOD datasets when ImageNet-200 is ID. For each column, the top five methods are marked in **bold**. Note that N/A indicates that results are not reported in OpenOOD. *CRAFT* ranks within the top five methods in all three near-OOD detection scenarios.

| Method                            | Near OOD                           |                                    |                                    | Far OOD                            |                                    |                                    |                                    |
|-----------------------------------|------------------------------------|------------------------------------|------------------------------------|------------------------------------|------------------------------------|------------------------------------|------------------------------------|
|                                   | SSB-hard                           | NINCO                              | Average                            | iNaturalist                        | Textures                           | OpenImage-O                        | Average                            |
| Post-hoc inference methods        |                                    |                                    |                                    |                                    |                                    |                                    |                                    |
| OpenMax [1]                       | 77.53 $\pm$ 0.08                   | 83.01 $\pm$ 0.17                   | 80.27 $\pm$ 0.10                   | 92.32 $\pm$ 0.32                   | 90.21 $\pm$ 0.07                   | 88.07 $\pm$ 0.14                   | 90.20 $\pm$ 0.17                   |
| MSP [13]                          | 80.38 $\pm$ 0.03                   | 86.29 $\pm$ 0.11                   | 83.34 $\pm$ 0.06                   | 92.80 $\pm$ 0.25                   | 88.36 $\pm$ 0.13                   | 89.24 $\pm$ 0.02                   | 90.13 $\pm$ 0.09                   |
| TempScale [10]                    | <b>80.71 <math>\pm</math> 0.02</b> | <b>86.67 <math>\pm</math> 0.08</b> | <b>83.69 <math>\pm</math> 0.04</b> | 93.39 $\pm$ 0.25                   | 89.24 $\pm$ 0.11                   | 89.84 $\pm$ 0.02                   | 90.82 $\pm$ 0.09                   |
| ODIN [23]                         | 77.19 $\pm$ 0.06                   | 83.34 $\pm$ 0.12                   | 80.27 $\pm$ 0.08                   | <b>94.37 <math>\pm</math> 0.41</b> | 90.65 $\pm$ 0.20                   | 90.11 $\pm$ 0.15                   | 91.71 $\pm$ 0.19                   |
| MDS [22]                          | 58.38 $\pm$ 0.58                   | 65.48 $\pm$ 0.46                   | 61.93 $\pm$ 0.51                   | 75.03 $\pm$ 0.76                   | 79.25 $\pm$ 0.33                   | 69.87 $\pm$ 0.14                   | 74.72 $\pm$ 0.26                   |
| MDSEns [22]                       | 50.46 $\pm$ 0.36                   | 58.18 $\pm$ 0.42                   | 54.32 $\pm$ 0.24                   | 62.16 $\pm$ 0.73                   | 80.70 $\pm$ 0.48                   | 64.96 $\pm$ 0.51                   | 69.27 $\pm$ 0.57                   |
| RMDS [29]                         | 80.20 $\pm$ 0.23                   | 84.94 $\pm$ 0.28                   | 82.57 $\pm$ 0.25                   | 90.64 $\pm$ 0.46                   | 86.77 $\pm$ 0.38                   | 86.77 $\pm$ 0.22                   | 88.06 $\pm$ 0.34                   |
| Gram [31]                         | 65.95 $\pm$ 1.08                   | 69.40 $\pm$ 1.07                   | 67.67 $\pm$ 1.07                   | 65.30 $\pm$ 0.20                   | 80.53 $\pm$ 0.37                   | 67.72 $\pm$ 0.58                   | 71.19 $\pm$ 0.24                   |
| EBO [24]                          | 79.83 $\pm$ 0.02                   | 85.17 $\pm$ 0.11                   | 82.50 $\pm$ 0.05                   | 92.55 $\pm$ 0.50                   | 90.79 $\pm$ 0.16                   | 89.23 $\pm$ 0.26                   | 90.86 $\pm$ 0.21                   |
| OpenGAN [19]                      | 55.08 $\pm$ 1.84                   | 64.49 $\pm$ 4.98                   | 59.79 $\pm$ 3.39                   | 75.32 $\pm$ 3.32                   | 70.58 $\pm$ 4.66                   | 73.54 $\pm$ 4.48                   | 73.15 $\pm$ 4.07                   |
| GradNorm [17]                     | 72.12 $\pm$ 0.43                   | 73.39 $\pm$ 0.63                   | 72.75 $\pm$ 0.48                   | 86.06 $\pm$ 1.90                   | 86.07 $\pm$ 0.36                   | 80.66 $\pm$ 1.09                   | 84.26 $\pm$ 0.87                   |
| ReAct [33]                        | 78.97 $\pm$ 1.33                   | 84.76 $\pm$ 0.64                   | 81.87 $\pm$ 0.98                   | 93.65 $\pm$ 0.88                   | <b>92.86 <math>\pm</math> 0.47</b> | <b>90.40 <math>\pm</math> 0.35</b> | <b>92.31 <math>\pm</math> 0.56</b> |
| MLS [12]                          | 80.15 $\pm$ 0.01                   | 85.65 $\pm$ 0.09                   | 82.90 $\pm$ 0.04                   | 93.12 $\pm$ 0.45                   | 90.60 $\pm$ 0.16                   | 89.62 $\pm$ 0.21                   | 91.11 $\pm$ 0.19                   |
| KLM [12]                          | 77.56 $\pm$ 0.18                   | 83.96 $\pm$ 0.12                   | 80.76 $\pm$ 0.08                   | 91.80 $\pm$ 0.21                   | 86.13 $\pm$ 0.12                   | 87.66 $\pm$ 0.17                   | 88.53 $\pm$ 0.11                   |
| VIM [39]                          | 74.04 $\pm$ 0.31                   | 83.32 $\pm$ 0.19                   | 78.68 $\pm$ 0.24                   | 90.96 $\pm$ 0.36                   | <b>94.61 <math>\pm</math> 0.12</b> | 88.20 $\pm$ 0.18                   | 91.26 $\pm$ 0.19                   |
| KNN [35]                          | 77.03 $\pm$ 0.23                   | 86.10 $\pm$ 0.12                   | 81.57 $\pm$ 0.17                   | <b>93.99 <math>\pm</math> 0.36</b> | <b>95.29 <math>\pm</math> 0.02</b> | <b>90.19 <math>\pm</math> 0.32</b> | <b>93.16 <math>\pm</math> 0.22</b> |
| DICE [34]                         | 79.06 $\pm$ 0.05                   | 84.49 $\pm$ 0.24                   | 81.78 $\pm$ 0.14                   | 91.81 $\pm$ 0.79                   | 91.53 $\pm$ 0.21                   | 89.06 $\pm$ 0.34                   | 90.80 $\pm$ 0.31                   |
| RankFeat [32]                     | 58.74 $\pm$ 0.94                   | 55.10 $\pm$ 2.52                   | 56.92 $\pm$ 1.59                   | 33.08 $\pm$ 4.68                   | 29.10 $\pm$ 2.57                   | 52.48 $\pm$ 4.44                   | 38.22 $\pm$ 3.85                   |
| ASH [8]                           | 79.52 $\pm$ 0.37                   | 85.24 $\pm$ 0.08                   | 82.38 $\pm$ 0.19                   | <b>95.10 <math>\pm</math> 0.47</b> | <b>94.77 <math>\pm</math> 0.19</b> | <b>91.82 <math>\pm</math> 0.25</b> | <b>93.90 <math>\pm</math> 0.27</b> |
| SHE [44]                          | 78.30 $\pm$ 0.20                   | 82.07 $\pm$ 0.33                   | 80.18 $\pm$ 0.25                   | 91.43 $\pm$ 1.28                   | 90.51 $\pm$ 0.19                   | 87.49 $\pm$ 0.70                   | 89.81 $\pm$ 0.61                   |
| GEN [25]                          | <b>80.75 <math>\pm</math> 0.03</b> | <b>86.60 <math>\pm</math> 0.08</b> | <b>83.68 <math>\pm</math> 0.06</b> | 93.70 $\pm$ 0.18                   | 90.25 $\pm$ 0.10                   | <b>90.13 <math>\pm</math> 0.06</b> | 91.36 $\pm$ 0.10                   |
| ExCeL [18]                        | 79.39 $\pm$ 0.03                   | 85.40 $\pm$ 0.04                   | 82.40 $\pm$ 0.04                   | <b>93.76 <math>\pm</math> 0.43</b> | 92.40 $\pm$ 0.05                   | 89.75 $\pm$ 0.32                   | 91.97 $\pm$ 0.27                   |
| Training methods without outliers |                                    |                                    |                                    |                                    |                                    |                                    |                                    |
| CRAFT (Ours)                      | <b>80.70 <math>\pm</math> 0.18</b> | <b>86.74 <math>\pm</math> 0.84</b> | <b>83.65 <math>\pm</math> 0.41</b> | 92.85 $\pm$ 0.66                   | 89.94 $\pm$ 0.49                   | 89.85 $\pm$ 0.46                   | 90.88 $\pm$ 0.89                   |
| ConfBranch [7]                    | 75.01 $\pm$ 0.35                   | 83.19 $\pm$ 0.14                   | 79.10 $\pm$ 0.24                   | 93.40 $\pm$ 0.09                   | 89.64 $\pm$ 0.52                   | 88.26 $\pm$ 0.07                   | 90.43 $\pm$ 0.18                   |
| G-ODIN [15]                       | 72.94 $\pm$ 0.05                   | 81.63 $\pm$ 0.21                   | 77.28 $\pm$ 0.10                   | 93.12 $\pm$ 0.21                   | <b>93.67 <math>\pm</math> 0.21</b> | 90.18 $\pm$ 0.15                   | <b>92.33 <math>\pm</math> 0.11</b> |
| CSI [36]                          | N/A                                |
| ARPL [4]                          | 79.24 $\pm$ 0.14                   | 84.81 $\pm$ 0.07                   | 82.02 $\pm$ 0.10                   | 91.54 $\pm$ 0.05                   | 88.11 $\pm$ 0.34                   | 88.04 $\pm$ 0.20                   | 89.23 $\pm$ 0.11                   |
| MOS [16]                          | 66.54 $\pm$ 0.49                   | 73.14 $\pm$ 0.47                   | 69.84 $\pm$ 0.46                   | 79.69 $\pm$ 1.38                   | 81.38 $\pm$ 0.75                   | 80.29 $\pm$ 0.68                   | 80.46 $\pm$ 0.92                   |
| LogitNorm [40]                    | 78.42 $\pm$ 0.23                   | <b>86.90 <math>\pm</math> 0.07</b> | 82.66 $\pm$ 0.15                   | <b>96.26 <math>\pm</math> 0.20</b> | 91.85 $\pm$ 0.21                   | <b>91.01 <math>\pm</math> 0.27</b> | <b>93.04 <math>\pm</math> 0.21</b> |
| CIDER [27]                        | 76.04 $\pm$ 2.37                   | 85.13 $\pm$ 1.13                   | 80.58 $\pm$ 1.75                   | 90.69 $\pm$ 2.13                   | 92.38 $\pm$ 1.35                   | 88.92 $\pm$ 1.58                   | 90.66 $\pm$ 1.68                   |
| Training methods with outliers    |                                    |                                    |                                    |                                    |                                    |                                    |                                    |
| OE [14]                           | <b>82.34 <math>\pm</math> 0.16</b> | <b>87.35 <math>\pm</math> 0.23</b> | <b>84.84 <math>\pm</math> 0.16</b> | 90.30 $\pm$ 0.16                   | 87.76 $\pm$ 0.32                   | 89.01 $\pm$ 0.24                   | 89.02 $\pm$ 0.18                   |
| MCD [43]                          | <b>81.51 <math>\pm</math> 0.14</b> | 85.74 $\pm$ 0.07                   | <b>83.62 <math>\pm</math> 0.09</b> | 90.83 $\pm$ 0.10                   | 86.87 $\pm$ 0.12                   | 89.12 $\pm$ 0.18                   | 88.94 $\pm$ 0.10                   |
| UDG [42]                          | 70.73 $\pm$ 1.74                   | 77.88 $\pm$ 1.56                   | 74.30 $\pm$ 1.63                   | 85.95 $\pm$ 2.97                   | 81.79 $\pm$ 2.57                   | 78.54 $\pm$ 2.98                   | 82.09 $\pm$ 2.78                   |
| MixOE [45]                        | 80.23 $\pm$ 0.15                   | 85.01 $\pm$ 0.10                   | 82.62 $\pm$ 0.03                   | 90.64 $\pm$ 0.36                   | 86.80 $\pm$ 0.45                   | 87.36 $\pm$ 0.49                   | 88.27 $\pm$ 0.41                   |

Table 13. Performance (FPR95 (%  $\downarrow$ )) variation of Outlier Exposure (OE) method across various auxiliary outlier training data. The results demonstrate a notable bias towards outliers that are similar to those seen during training. For example, when tin597 is used for training, the performance on TinyImageNet is significantly better. Similarly, when FashionMNIST or notMNIST are used for training, the FPR95 on the MNIST test set is unusually low. This implies that the OE method tends to perform better on OOD datasets that resemble the outliers seen during training, indicating a bias towards seen outliers.

| ID Dataset | Auxiliary Outlier Training Data | Near OOD |              |         | Far OOD     |       |          |            |         |
|------------|---------------------------------|----------|--------------|---------|-------------|-------|----------|------------|---------|
|            |                                 | CIFAR100 | TinyImageNet | Average | MNIST       | SVHN  | Textures | Places 365 | Average |
| CIFAR10    | tin597 [46]                     | 36.71    | <b>2.97</b>  | 19.84   | 24.67       | 1.25  | 12.07    | 14.53      | 13.13   |
|            | NINCO [2]                       | 42.57    | 18.54        | 30.56   | 32.91       | 19.67 | 7.69     | 19.50      | 19.94   |
|            | FashionMNIST [41]               | 41.89    | 35.26        | 38.57   | <b>0.33</b> | 24.32 | 31.31    | 35.53      | 22.88   |
|            | notMNIST [3]                    | 52.71    | 44.67        | 48.69   | <b>0.00</b> | 19.07 | 41.01    | 48.81      | 27.22   |
| CIFAR100   | tin597 [46]                     | 61.26    | <b>0.21</b>  | 30.73   | 53.31       | 51.84 | 55.83    | 58.30      | 54.82   |
|            | NINCO [2]                       | 63.92    | 35.56        | 49.74   | 60.36       | 35.13 | 29.93    | 38.10      | 40.88   |
|            | FashionMNIST [41]               | 59.84    | 52.63        | 56.24   | <b>0.00</b> | 44.60 | 63.09    | 57.83      | 41.38   |
|            | notMNIST [3]                    | 60.20    | 52.51        | 56.36   | <b>0.00</b> | 49.16 | 62.70    | 57.46      | 42.33   |
